# Supplementary material for: Far-red fluorescence and chiroptical properties of pyrrolopyrrole aza-BODIPYs induced by the B,O-chelation
Source: Royal Society of Chemistry journal article supplement (doi:10.1039/d4cc01586j), 2024-01-01
Supplement: d4cc01586j1.pdf [file d4cc01586j1.pdf]

## Supporting Information

### *Far-red fluorescence and chiroptical properties of pyrrolopyrrole aza-BODIPYs induced by the B,O-chelation*

Shuhei Fukami,<sup>a</sup> Shigeki Mori,<sup>b</sup> Takunori Harada<sup>c</sup> and Soji Shimizu\*<sup>a</sup>

<sup>a</sup>Department of Applied Chemistry, Graduate School of Engineering and Centre for Molecular Systems, Kyushu University, Fukuoka 819-0395, Japan

<sup>b</sup>Advanced Research Support Centre (ADRES), Ehime University, Matsuyama 790-8577, Japan

<sup>c</sup>Department of Integrated Science and Technology, Faculty of Science and Technology, Oita University, Oita 870-1192, Japan

#### **Contents:**

- i. Experimental
- ii. HR-MS Spectra
- iii. NMR Spectra
- iv. Crystallographic Data
- v. UV/vis Absorption, Excitation and Fluorescence Spectra
- vi. Electrochemistry
- vii. DFT and TDDFT Calculations
- viii. Estimation of Dissymmetry Factors of Theoretical CD and CPL
- ix. References
- x. Appendix

## i. Experimental

**General procedure:** High-resolution mass spectrometry was performed on a BRUKER micrOTOF-Q III spectrometer (ESI mode with Tuning Mix as an external standard calibration). <sup>1</sup>H NMR spectra were recorded on a JEOL JNM-ECX500R spectrometer (operating at 495.132 MHz for <sup>1</sup>H, 124.501 MHz for <sup>13</sup>C and 465.8894 MHz for <sup>19</sup>F) using residual solvent as an internal reference for <sup>1</sup>H ( $\delta$  = 7.26 ppm for CDCl<sub>3</sub> and  $\delta$  = 5.32 ppm for CD<sub>2</sub>Cl<sub>2</sub>) and <sup>13</sup>C ( $\delta$  = 77.16 ppm for CDCl<sub>3</sub>) and using trifluoroacetic acid as an external reference for <sup>19</sup>F ( $\delta$  = -76.55 ppm). Electronic absorption spectra were recorded on a JASCO V-770 spectrophotometer. Fluorescence spectra in solution were measured on a JASCO FR-8650 spectrometer. Absolute fluorescence quantum yields in solution were measured on a HAMAMATSU C13534-21 calibrated integrating-sphere system with self-absorption correction. Circular dichroism (CD) spectra were measured on a JASCO J-1500 spectrophotometer. Circularly polarized luminescence (CPL) and DC (= nonpolarized fluorescence) spectra were measured on a Comprehensive Chiroptical Spectrophotometer (CCS-1)<sup>1</sup> equipped with the Stokes-Mueller matrix analysis system. The excitation wavelength was set to be 620 nm, and the emission spectra were recorded over a wavelength range of 850–650 nm with 980 V high-tension voltage, 33 mm slit width and 10 nm spectral bandwidth for the excitation and emission monochromators. The CPL dissymmetry factors ( $g_{\text{CPL}}$ ) were calculated according to  $g_{\text{CPL}} = \Delta F (= I_L - I_R) / F (= I_L + I_R)$ , where  $I_L$  and  $I_R$  are the intensities of the left- and right-handed CPL emissions.<sup>2</sup> Preparative separations were performed using silica gel column chromatography (KANTO Silica Gel 60 N, spherical, neutral, 40–50  $\mu\text{m}$  or KANTO Silica Gel 60 N, spherical, neutral, 63–210  $\mu\text{m}$ ). Thin-layer chromatography (TLC) was performed with aluminum sheet silica gel 60 F<sub>254</sub> (Merck). All reagents and solvents used for syntheses were of commercial reagent grade and were used without further purification except where noted. Spectroscopic grade solvents were used for spectroscopy.

**Crystallographic data collection and structure refinement:** Suitable crystals for X-ray diffraction analysis were obtained by a vapor diffusion method. Data collection was carried out at -173 °C on a Rigaku Saturn724 diffractometer with MoK $\alpha$  radiation. The structure was solved by a direct method (SHELXT)<sup>3</sup> and refined using a full-matrix least squares technique (SHELXL).<sup>4</sup> CCDC 2342651 and 2343541 contain the supplementary crystallographic data for this paper. These data can be obtained free of charge via [www.ccdc.cam.ac.uk/data\\_request/cif](http://www.ccdc.cam.ac.uk/data_request/cif), or by emailing [data\\_request@ccdc.cam.ac.uk](mailto:data_request@ccdc.cam.ac.uk), or by contacting The Cambridge Crystallographic Data Centre, 12 Union Road, Cambridge CB2 1EZ, UK; fax: +44 1223 336033.

**Electrochemical measurements:** Cyclic voltammograms (CV) were recorded on a CH Instrument Model 620B (ALS) under an argon atmosphere in an *o*-dichlorobenzene (*o*-DCB) solution with 0.1 M tetra-*n*-butylammonium perchlorate (TBAP) as a supporting electrolyte. Measurements were made with a glassy carbon working electrode, a Ag/AgCl reference electrode and a Pt wire counter electrode. The concentration of the solution was fixed at 0.5 mM, and the scan rates were set to 100 mV s<sup>-1</sup> for CV measurements. A ferrocenium/ferrocene (Fc<sup>+</sup>/Fc) couple was used as an internal standard.

**Theoretical calculation details:** The Gaussian 16 software package<sup>5</sup> was used to perform DFT and TDDFT calculations using the  $\omega$ B97XD<sup>6</sup> with 6-31G(d) basis set.<sup>7</sup>

## Synthetic procedure

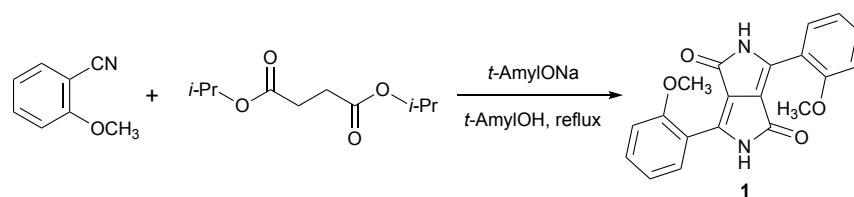

**Scheme S1.** Synthesis of 3,6-bis(2-methoxyphenyl)-2,5-dihydropyrrolo[3,4-*c*]pyrrole-1,4-dione (**1**).

**3,6-Bis(2-methoxyphenyl)-2,5-dihydropyrrolo[3,4-*c*]pyrrole-1,4-dione (**1**):** **1** was synthesized according to the literature procedure with slight modifications.<sup>8</sup> Sodium (1.5 g, 65 mmol) and a small amount of iron(III) chloride were added to dry *t*-amyl alcohol (25 mL), and the mixture was refluxed. After sodium was dissolved, 2-methoxybenzonitrile (3.8 mL, 30 mmol) was added. Diisopropyl succinate (3.0 mL, 15 mmol) was added dropwise to the reaction mixture over 20 h. After completion of the addition, the reaction mixture was allowed to cool to room temperature, and acetic acid (32 mL) and methanol (50 mL) were added. The precipitate was filtered and washed with methanol and water to afford **1** as a dark red solid (235 mg, 4.5%).

<sup>1</sup>H NMR (495 MHz, CD<sub>2</sub>Cl<sub>2</sub> and one drop of D<sub>2</sub>O, 297 K):  $\delta$ [ppm] 9.34 (br, 2H), 9.21(d,  $J$  = 8.0 Hz 2H), 7.51 (t,  $J$  = 15.1 Hz, 2H), 7.20(t,  $J$  = 15.5 Hz, 2H), 7.07 (d,  $J$  = 8.5 Hz, 2H), 4.79 (s, 6H).

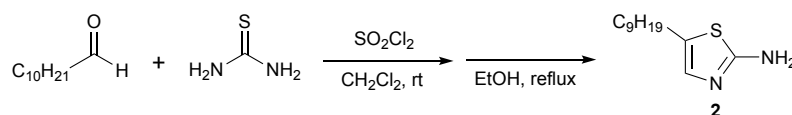

**Scheme S2.** Synthesis of 2-amino-5-nonylthiazole (**2**).

**2-Amino-5-nonylthiazole (**2**):** **2** was synthesized according to the literature procedure with slight modifications.<sup>9</sup> 1-Undecanal (6.9 mL, 36 mmol) and thiourea (4.5 g, 1.6 eq) were suspended in dry dichloromethane (15 mL). The mixture was cooled to 0 °C, and SO<sub>2</sub>Cl<sub>2</sub> (3.0 mL, 1.2 eq) was added dropwise. Then the mixture was allowed to warm up to 15–25 °C. After stirring for 2 h, most of the solvent was removed under reduced pressure, and dry ethanol (15 mL) was added. The mixture was refluxed for 4 h. The solvent was evaporated, water was added, and the crude mixture was extracted with ethyl acetate and washed with aqueous NaHCO<sub>3</sub> solution. After drying over Na<sub>2</sub>SO<sub>4</sub> and evaporation of the solvent, the mixture was purified by silica gel column chromatography (CH<sub>2</sub>Cl<sub>2</sub>/MeOH = 20:1 (v/v)) to give **2** as a white solid (4.2 g, 51%).

<sup>1</sup>H NMR (495 MHz, CDCl<sub>3</sub>, 297 K):  $\delta$ [ppm] 6.72 (s, 1H), 4.71 (br, 2H), 2.62 (t,  $J$  = 7.7 Hz, 2H), 1.29–1.17 (m, 14H), 0.87 (t,  $J$  = 7.0 Hz, 3H).

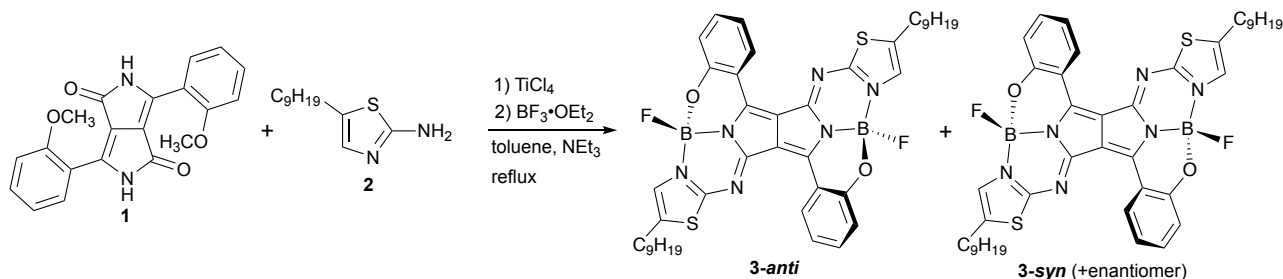

**Scheme S3.** Synthesis of *B,O*-chelated PPAB with fluorine ligands (**3**).

***B,O*-Chelated PPAB with fluorine ligands (**3**):** **1** (62 mg, 0.18 mmol) and **2** (203 mg, 5 eq) were added to dry

toluene (6 mL), and the mixture was refluxed.  $\text{TiCl}_4$  (0.11 mL, 6.1 eq) and triethylamine (0.36 mL, 14 eq) were successively added. After 3 h, imine formation was confirmed by TLC analysis, and  $\text{BF}_3 \cdot \text{OEt}_2$  (0.33 mL, 15 eq) was added. After refluxing overnight, the reaction mixture was poured into water and extracted with dichloromethane. The reaction mixture was dried over  $\text{Na}_2\text{SO}_4$ , and the solvent was removed by a rotary evaporator. The crude mixture was purified by silica gel column chromatography ( $\text{CH}_2\text{Cl}_2$ , then  $\text{CH}_2\text{Cl}_2/\text{hexane} = 1:3$  (v/v)) to provide **3** as a green solid.

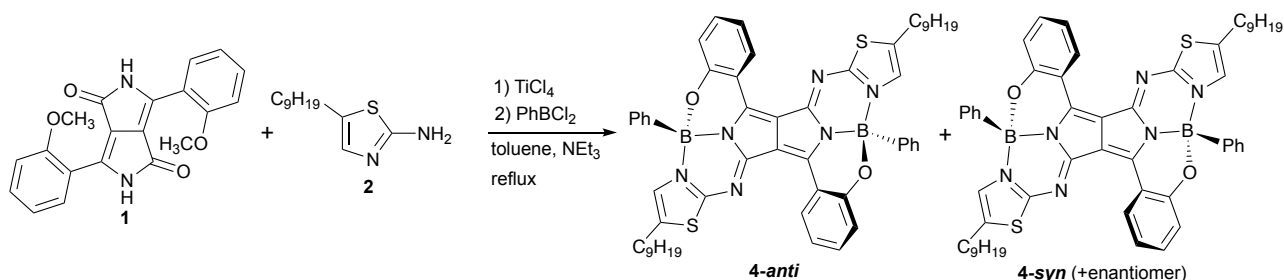

**Scheme S4.** Synthesis of *B,O*-chelated PPAB with phenyl ligands (**4**).

***B,O*-Chelated PPAB with phenyl ligands (**4**):** **1** (62 mg, 0.18 mmol) and **2** (203 mg, 5 eq) were added to dry toluene (6 mL), and the mixture was refluxed.  $\text{TiCl}_4$  (0.11 mL, 6.1 eq) and triethylamine (0.36 mL, 14 eq) were successively added. After 3 h, the imine formation was confirmed by TLC analysis, and dichlorophenylborane (0.33 mL, 15 eq) was added. After refluxing overnight, the reaction mixture was poured into water and extracted with dichloromethane. The reaction mixture was dried over  $\text{Na}_2\text{SO}_4$ , and the solvent was removed by a rotary evaporator. The crude mixture was purified by silica gel column chromatography ( $\text{CH}_2\text{Cl}_2$ , then  $\text{CH}_2\text{Cl}_2/\text{hexane} = 1:3$  (v/v)) to provide **4-anti** and **4-syn** as green solids (**4-anti**: 22.3 mg (14%), **4-syn**: 18.9 mg (12%)).

**4-anti:**  $^1\text{H}$  NMR (495 MHz,  $\text{CD}_2\text{Cl}_2$ , 297 K):  $\delta$  [ppm] 8.53 (d,  $J = 6.5$  Hz, 2H), 7.47 (t,  $J = 15.0$  Hz, 2H), 7.26–7.24 (m, 6H), 7.18 (d,  $J = 7.5$  Hz, 2H), 7.13–7.06 (m, 8H), 2.71 (td,  $J_1 = 7.2$  Hz,  $J_2 = 3.4$  Hz, 4H), 1.65 (m, 4H), 1.30–1.26 (m, 24H), 0.88 (t,  $J = 6.8$  Hz, 6H);  $^{13}\text{C}$  NMR (125 MHz,  $\text{CDCl}_3$ , 297 K):  $\delta$  [ppm] 171.0, 158.4, 151.3, 144.3, 135.0, 132.6, 131.3, 131.0, 127.7, 127.5, 125.8, 120.8, 120.1, 117.9, 114.4, 32.0, 30.5, 29.6, 29.4, 29.4, 29.1, 27.8, 22.8, 14.3; UV/vis ( $\text{CH}_2\text{Cl}_2$ ):  $\lambda_{\text{max}}$  [nm] ( $\epsilon$  [ $\text{M}^{-1}\text{cm}^{-1}$ ]) 349 (32400), 473 (10900), 629 (44200), 689 (157000); HR-MS (ESI):  $[\text{M}+\text{H}]^+$  Calcd for  $\text{C}_{54}\text{H}_{59}\text{B}_2\text{N}_6\text{O}_2\text{S}_2$ : 909.4339; Found: 909.4392 (error: +5.8 ppm).

**4-syn:**  $^1\text{H}$  NMR (495 MHz,  $\text{CD}_2\text{Cl}_2$ , 297 K):  $\delta$  [ppm] 8.48 (d,  $J = 8.0$  Hz, 2H), 7.47 (t,  $J = 16.0$  Hz, 2H), 7.33 (d,  $J = 7.75$  Hz, 4H), 7.18–7.11 (m, 10H), 7.07 (t,  $J = 15.0$  Hz, 2H), 2.69 (t,  $J = 15.8$  Hz, 4H), 1.64 (t,  $J = 15.0$  Hz, 4H), 1.33–1.26 (m, 24H), 0.88 (t,  $J = 13.5$  Hz, 6H);  $^{13}\text{C}$  NMR (125 MHz,  $\text{CDCl}_3$ , 297 K):  $\delta$  [ppm] 171.1, 158.6, 151.0, 144.1, 135.1, 132.6, 131.5, 131.1, 127.8, 127.6, 125.9, 120.7, 119.9, 117.4, 114.1, 32.0, 30.5, 29.5, 29.4, 29.4, 29.1, 27.8, 22.8, 14.3; UV/vis ( $\text{CH}_2\text{Cl}_2$ ):  $\lambda_{\text{max}}$  [nm] ( $\epsilon$  [ $\text{M}^{-1}\text{cm}^{-1}$ ]) 349 (33800), 471 (11000), 624 (46500), 683 (166000); HR-MS (ESI):  $[\text{M}+\text{Na}]^+$  Calcd for  $\text{C}_{54}\text{H}_{58}\text{B}_2\text{N}_6\text{O}_2\text{S}_2\text{Na}$ : 931.4158; Found: 931.4219 (error: +6.5 ppm).



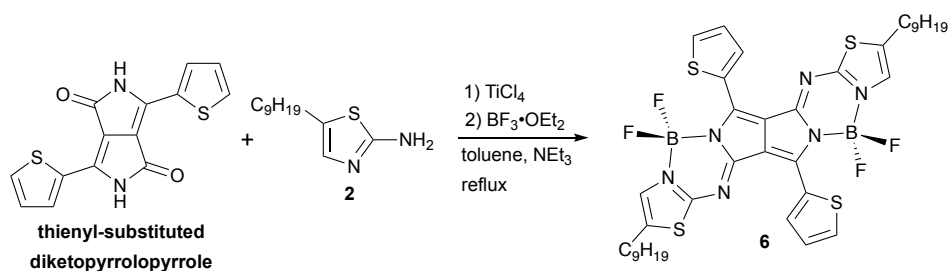

**Scheme S5.** Synthesis of PPAB with thienyl substituents (**6**).

**6:** Thienyl-substituted diketopyrrolopyrrole (198 mg, 0.66 mmol) and **2** (678 mg, 5 eq) were added to dry toluene (15 mL), and the mixture was refluxed.  $\text{TiCl}_4$  (0.45 mL) and triethylamine (1.3 mL) were successively added. After 3 h, the imine formation was confirmed by a TLC analysis. Then,  $\text{BF}_3 \cdot \text{OEt}_2$  (1.3 mL) was added. After refluxing overnight, the reaction mixture was poured into water and extracted with dichloromethane. The reaction mixture was dried over  $\text{Na}_2\text{SO}_4$ , and the solvent was removed by a rotary evaporator. The crude mixture was purified by silica gel column chromatography ( $\text{CH}_2\text{Cl}_2$ , then  $\text{CH}_2\text{Cl}_2/\text{hexane} = 1:3$  (v/v)) to afford **6** as a green solid (60 mg, 11%).

$^1\text{H}$  NMR (495 MHz,  $\text{CDCl}_3$ , 297 K):  $\delta$  [ppm] 8.95 (d,  $J = 4.0$  Hz, 2H), 7.76 (dd,  $J_1 = 5.1$  Hz,  $J_2 = 1.1$  Hz, 2H), 7.27 (d,  $J = 5.1$  Hz, 2H), 7.20 (s, 2H), 2.74 (t,  $J = 7.4$  Hz, 4H), 1.71-1.65 (m, 4H), 1.40 (t,  $J = 7.4$  Hz, 4H), 1.27 (s, 20H), 0.88 (t,  $J = 7.1$  Hz, 6H);  $^{13}\text{C}$  NMR (125 MHz,  $\text{CDCl}_3$ , 297 K):  $\delta$  [ppm] 169.6, 152.9, 144.5, 137.5, 133.9, 133.4, 131.5, 128.0, 125.7, 32.0, 30.6, 29.6, 29.4, 29.1, 27.8, 22.8, 14.3;  $^{19}\text{F}$  NMR (465 MHz,  $\text{CDCl}_3$ , 295 K):  $\delta$  [ppm] -130.6 (q,  $J_{\text{B-F}} = 30$  Hz); UV/vis ( $\text{CH}_2\text{Cl}_2$ ):  $\lambda_{\text{max}}$  [nm] ( $\epsilon$  [ $\text{M}^{-1}\text{cm}^{-1}$ ]) 341 (46000), 434 (29000), 617 (48000), 675 (117000); HR-MS (ESI):  $[M+\text{Na}]^+$  Calcd for  $\text{C}_{38}\text{H}_{46}\text{B}_2\text{N}_6\text{S}_4\text{Na}$ : 835.2694; Found: 835.2755 (error: +7.3 ppm).

## ii. HR-MS Spectra

### Acquisition Parameters

|             |            |               |           |                  |           |
|-------------|------------|---------------|-----------|------------------|-----------|
| Source Type | ESI        | Ion Polarity  | Positive  | Set Nebulizer    | 0.3 Bar   |
| Focus       | Not active | Set Capillary | 4500 V    | Set Dry Heater   | 180 °C    |
| Scan Begin  | 100 m/z    | Set End Plate | -400 V    | Set Dry Gas      | 4.0 l/min |
| Scan End    | 3000 m/z   | Offset        | 650.0 Vpp | Set Divert Valve | Source    |
|             |            | Cell RF       |           |                  |           |

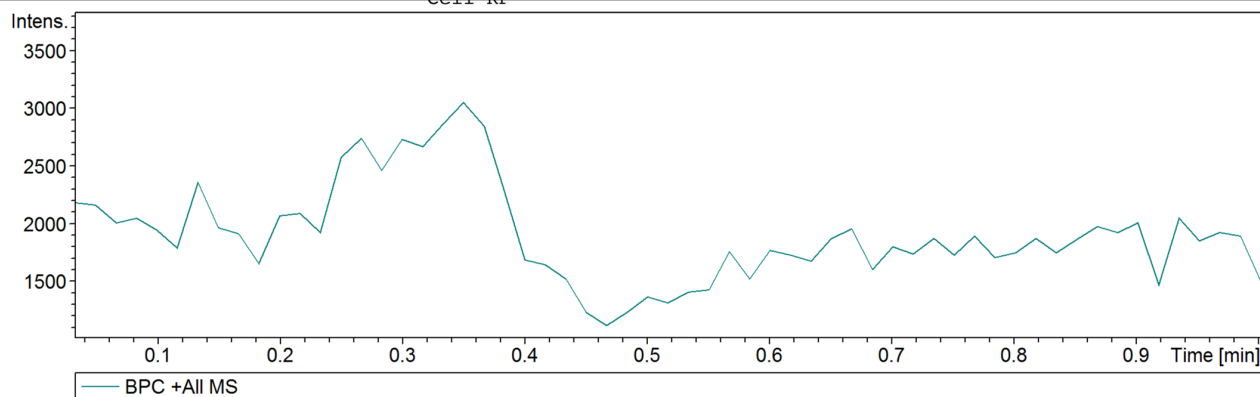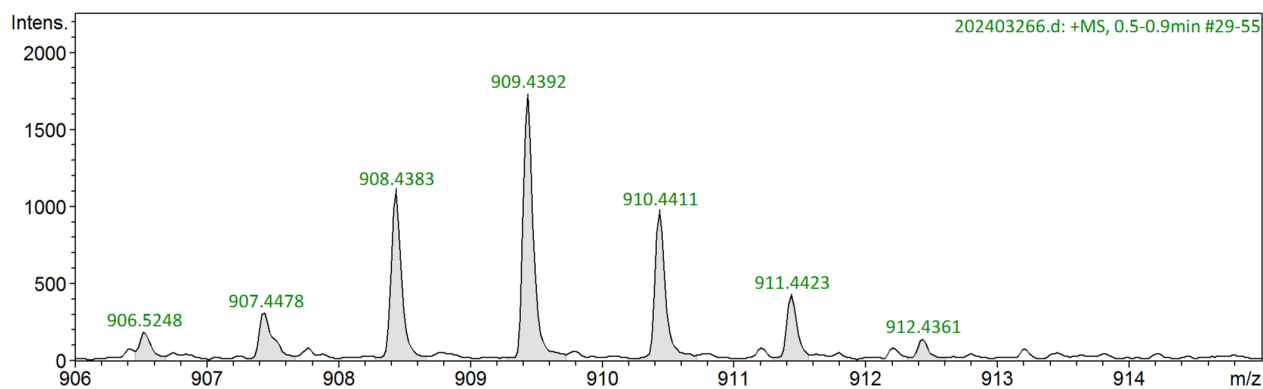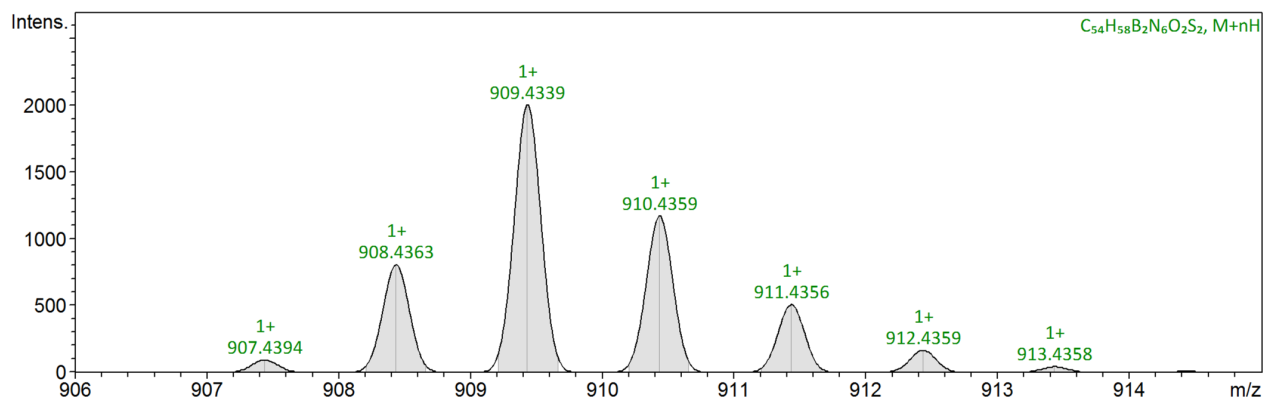

Fig. S1. HR-ESI-MS spectrum of **4-anti** (middle) and the isotope pattern (bottom).

Acquisition Parameters

|             |            |               |           |                  |           |
|-------------|------------|---------------|-----------|------------------|-----------|
| Source Type | ESI        | Ion Polarity  | Positive  | Set Nebulizer    | 0.3 Bar   |
| Focus       | Not active | Set Capillary | 4500 V    | Set Dry Heater   | 180 °C    |
| Scan Begin  | 100 m/z    | Set End Plate | -400 V    | Set Dry Gas      | 4.0 l/min |
| Scan End    | 3000 m/z   | Offset        | 650.0 Vpp | Set Divert Valve | Source    |
|             |            | Cell RF       |           |                  |           |

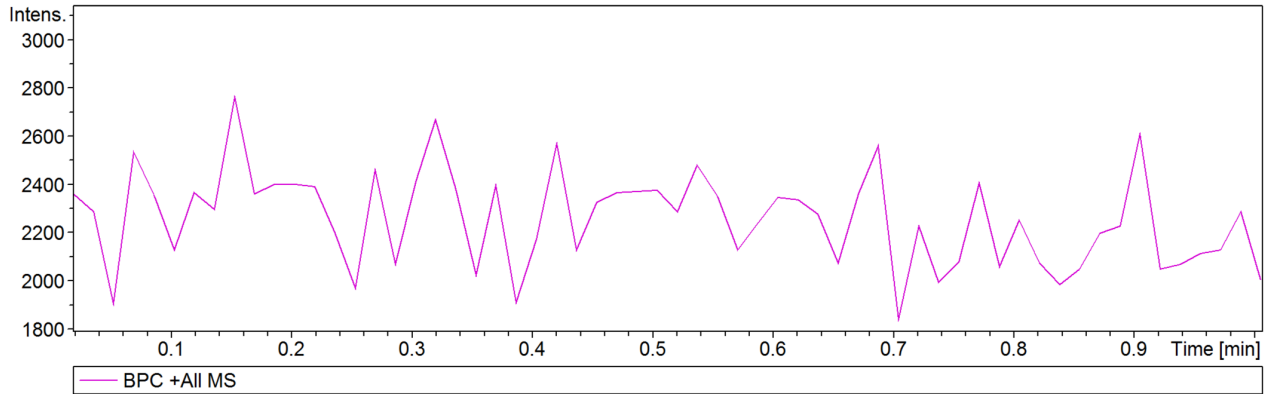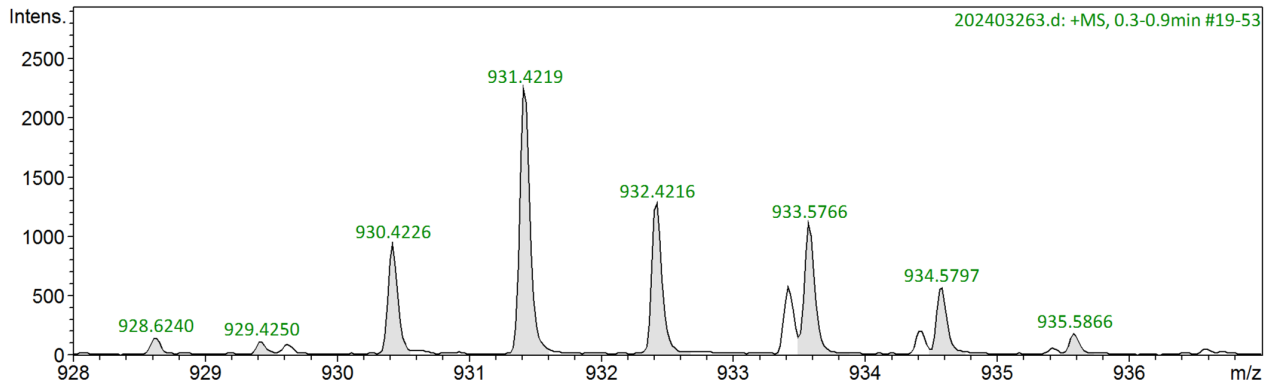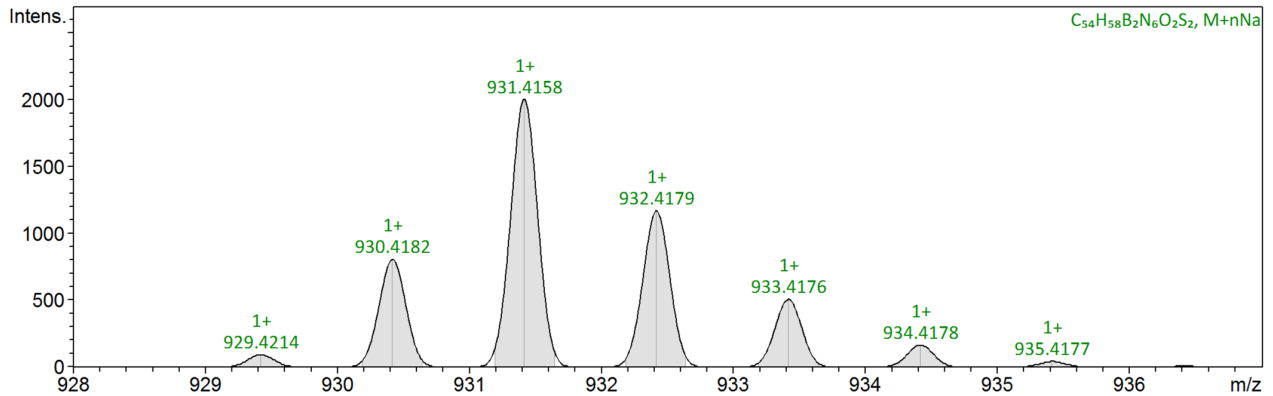

Fig. S2. HR-ESI-MS spectrum of 4-syn (middle) and the isotope pattern (bottom).

Acquisition Parameters

|             |            |               |           |                  |           |
|-------------|------------|---------------|-----------|------------------|-----------|
| Source Type | ESI        | Ion Polarity  | Positive  | Set Nebulizer    | 0.3 Bar   |
| Focus       | Not active | Set Capillary | 4500 V    | Set Dry Heater   | 180 °C    |
| Scan Begin  | 100 m/z    | Set End Plate | -400 V    | Set Dry Gas      | 4.0 l/min |
| Scan End    | 3000 m/z   | Offset        | 650.0 Vpp | Set Divert Valve | Source    |
|             |            | Cell RF       |           |                  |           |

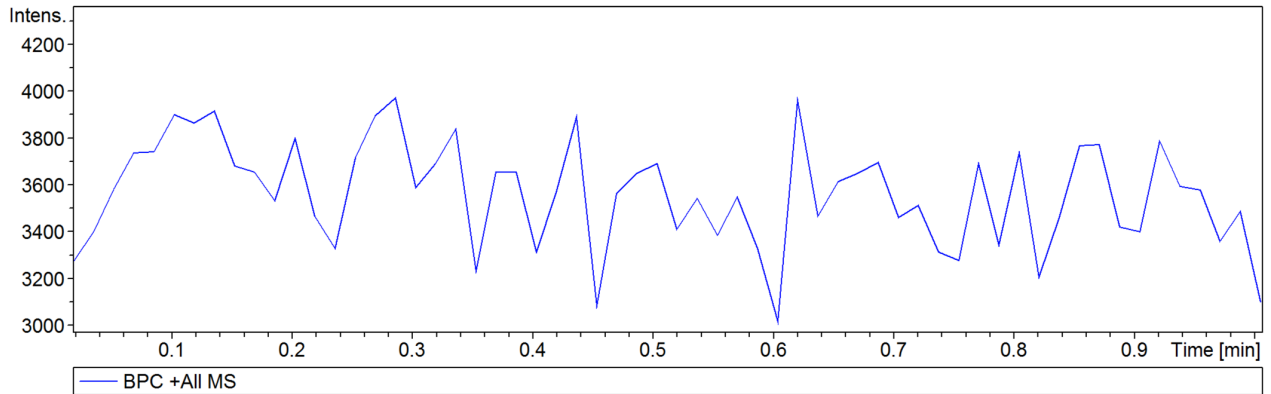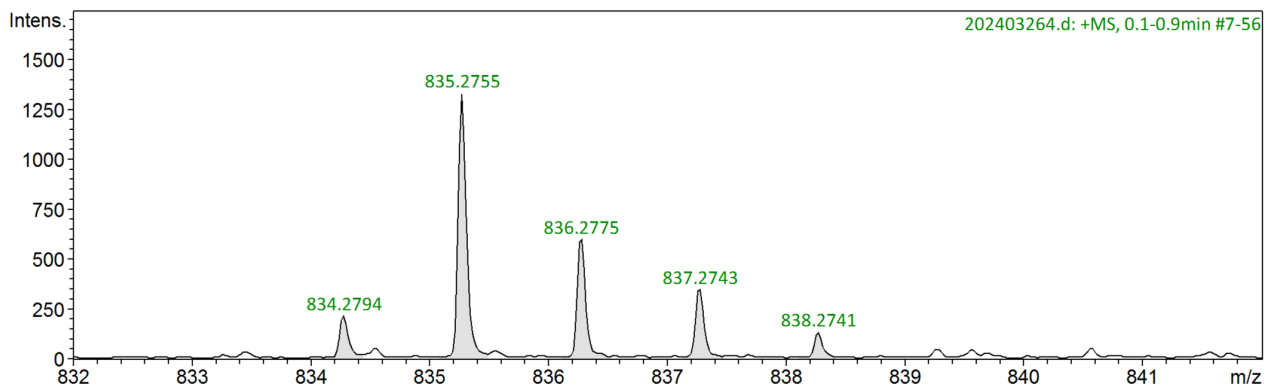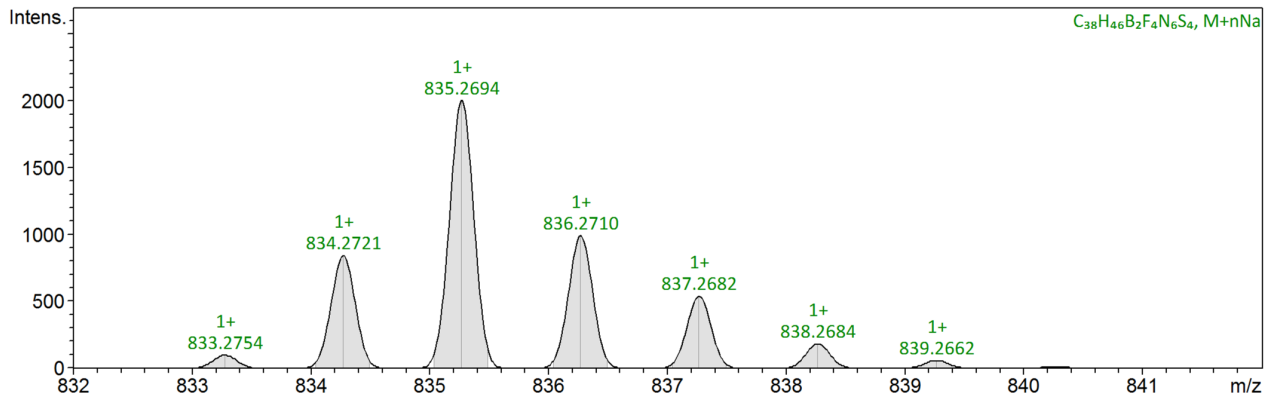

Fig. S3. HR-ESI-MS spectrum of **6** (middle) and the isotope pattern (bottom).

### iii. NMR Spectra

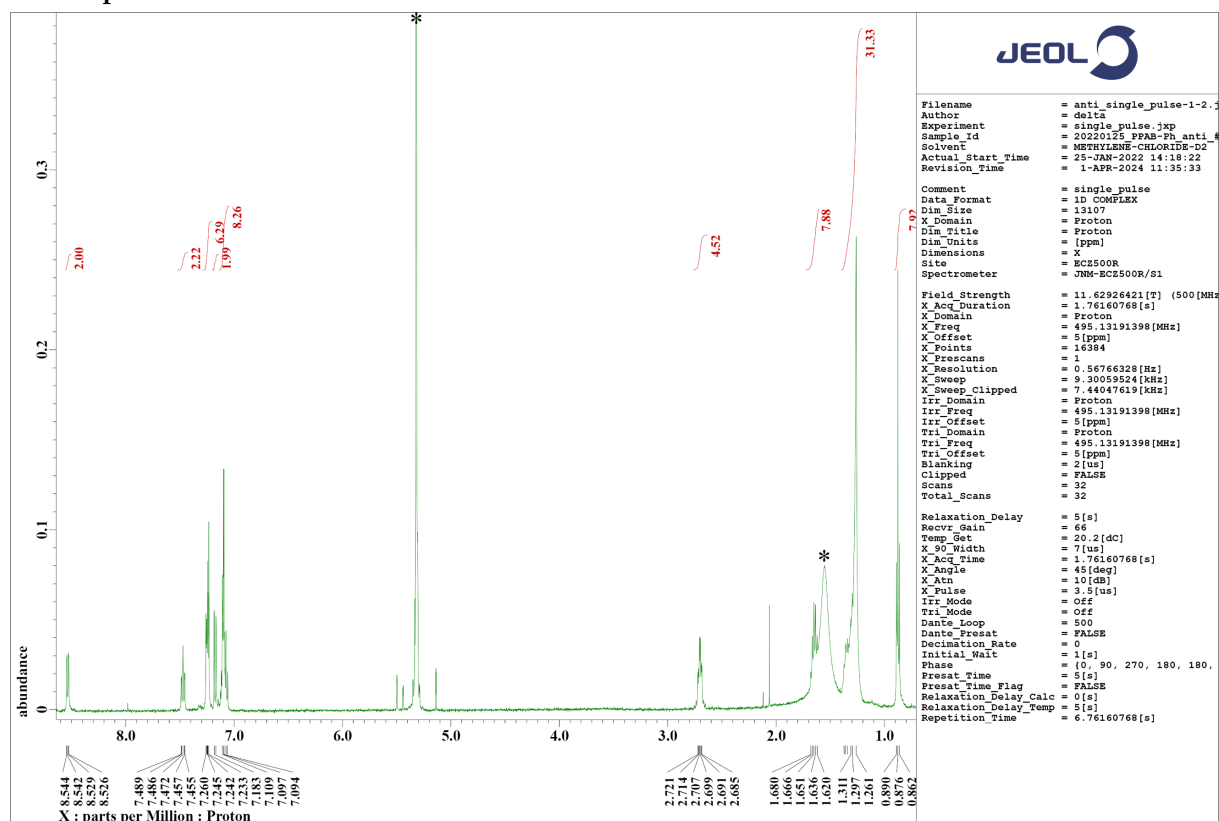

Fig. S4. <sup>1</sup>H NMR spectrum of 4-anti in CD<sub>2</sub>Cl<sub>2</sub>. \* indicates a residual solvent signal.

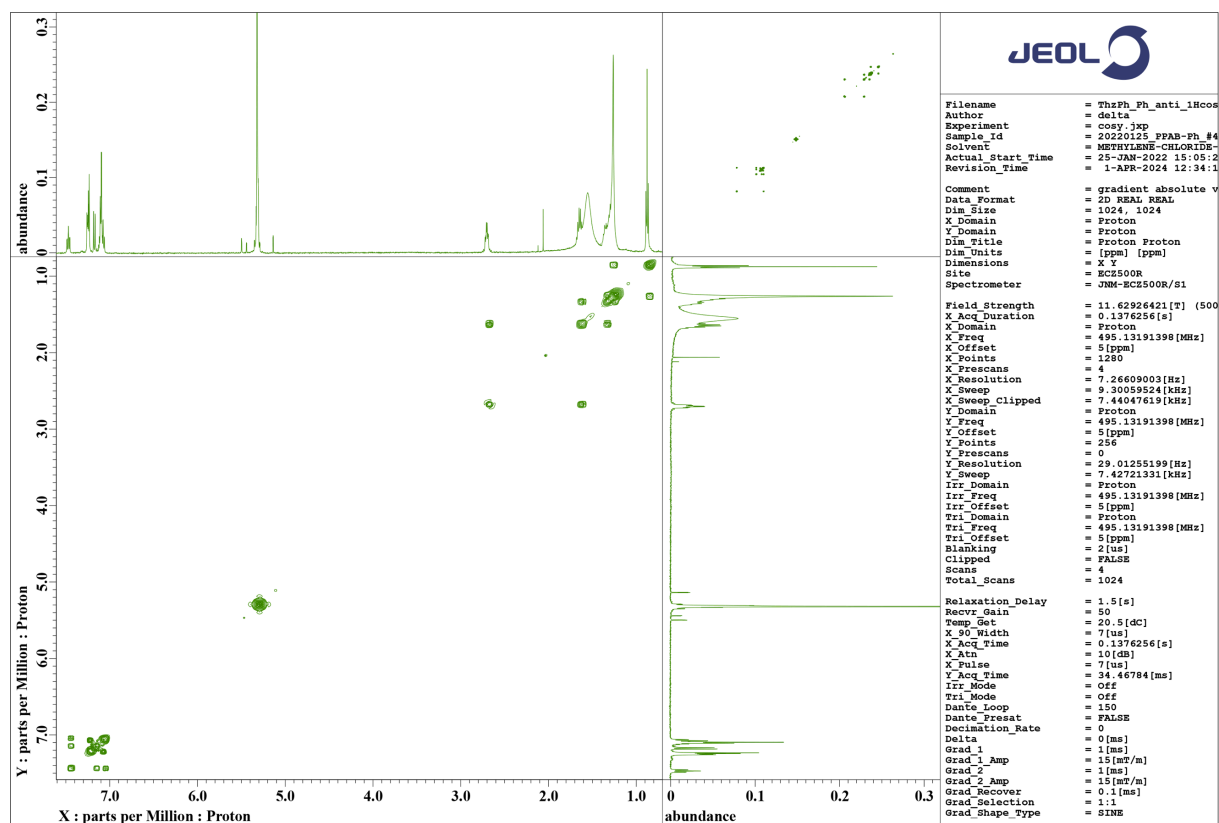

Fig. S5. <sup>1</sup>H-<sup>1</sup>H COSY spectrum of 4-anti in CD<sub>2</sub>Cl<sub>2</sub>.

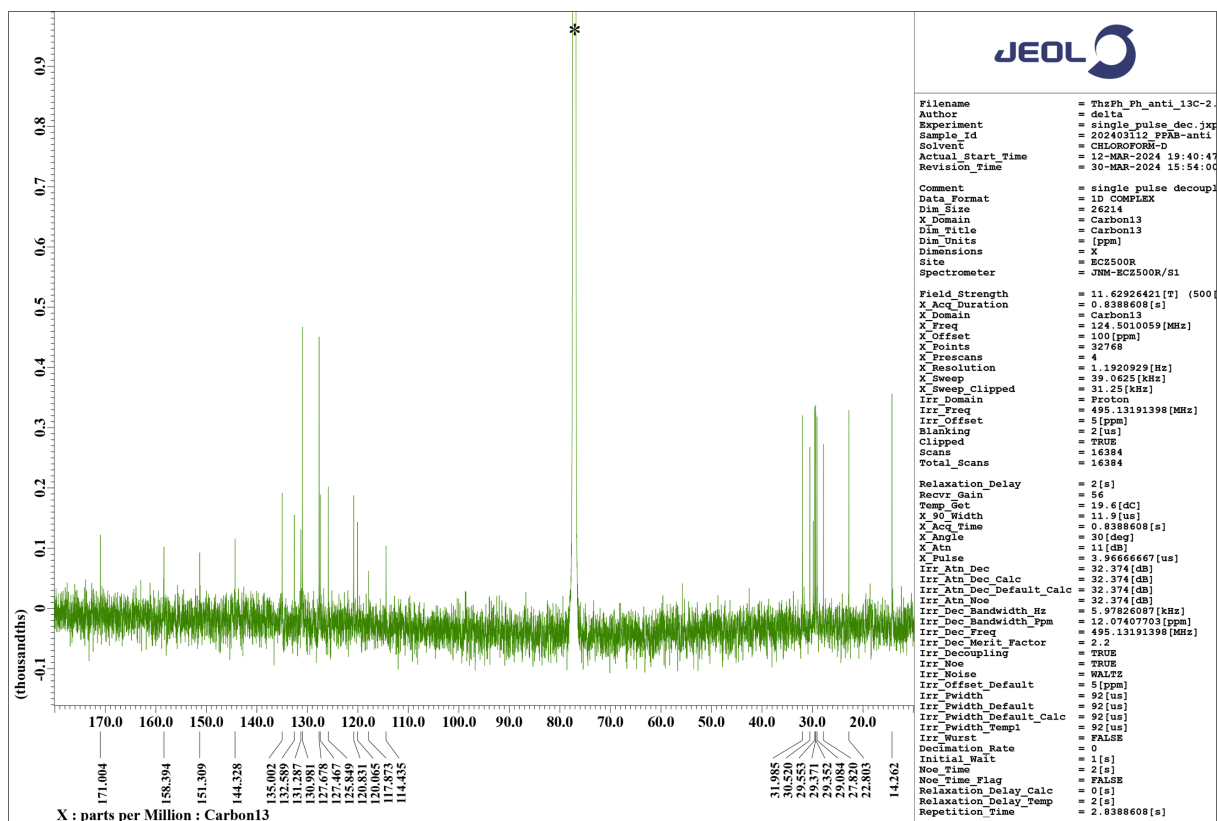

Fig. S6.  $^{13}\text{C}$  NMR spectrum of *4-anti* in  $\text{CDCl}_3$ . \* indicates a residual solvent signal.

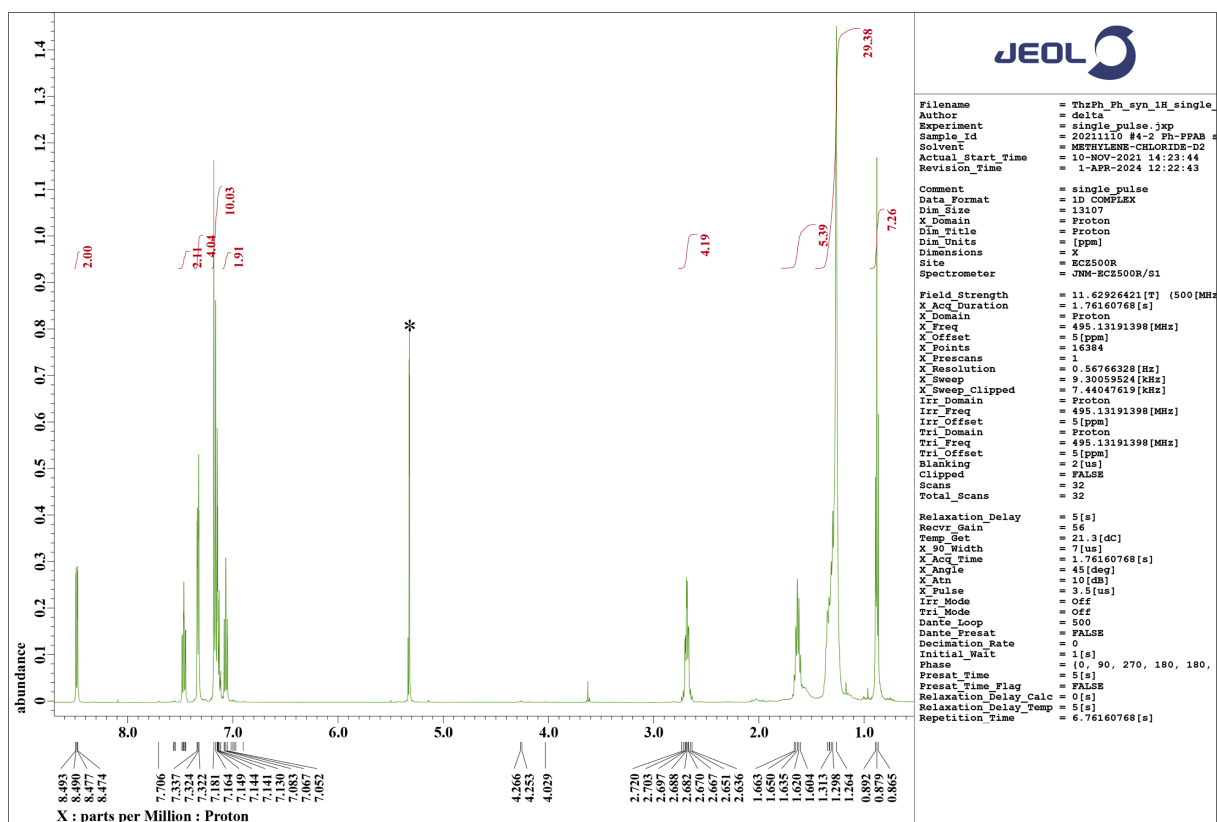

Fig. S7.  $^1\text{H}$  NMR spectrum of *4-syn* in  $\text{CD}_2\text{Cl}_2$ . \* indicates a residual solvent signal.

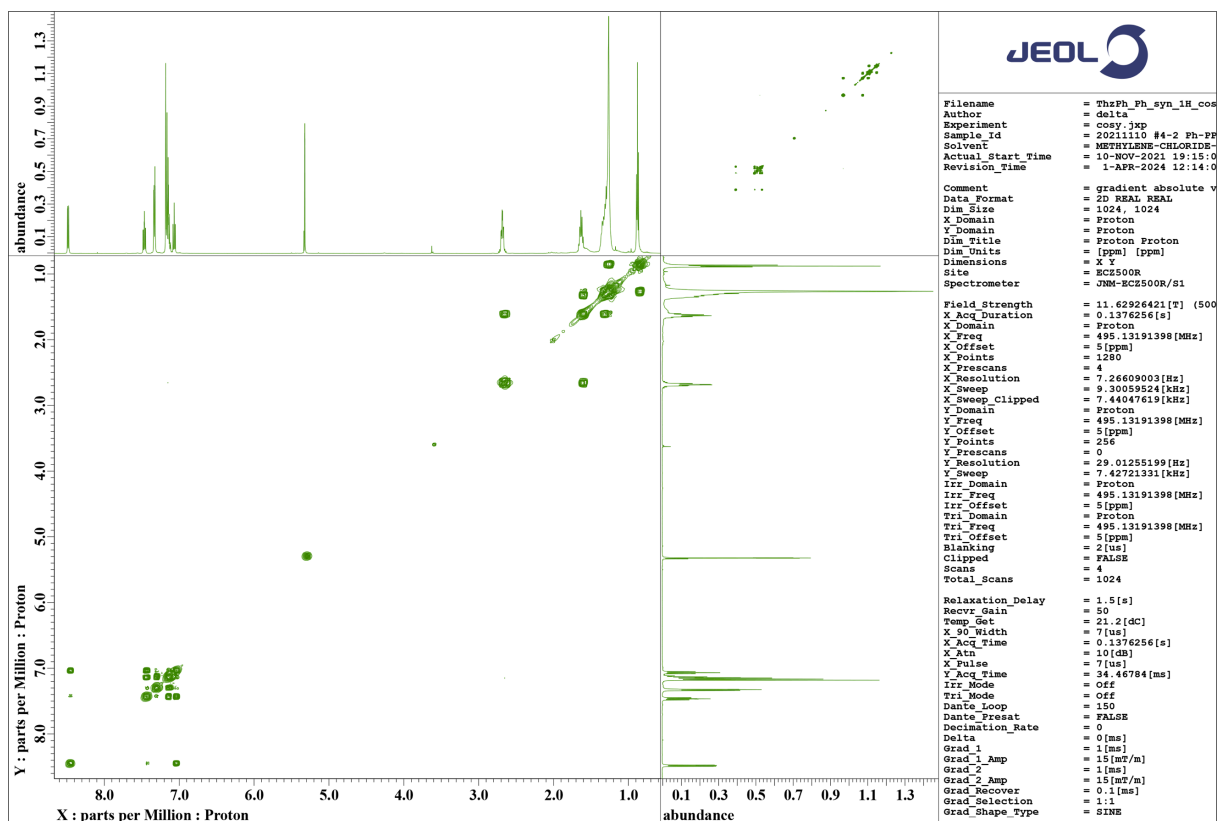

Fig. S8.  $^1\text{H}$ - $^1\text{H}$  COSY spectrum of **4-syn** in  $\text{CD}_2\text{Cl}_2$ .

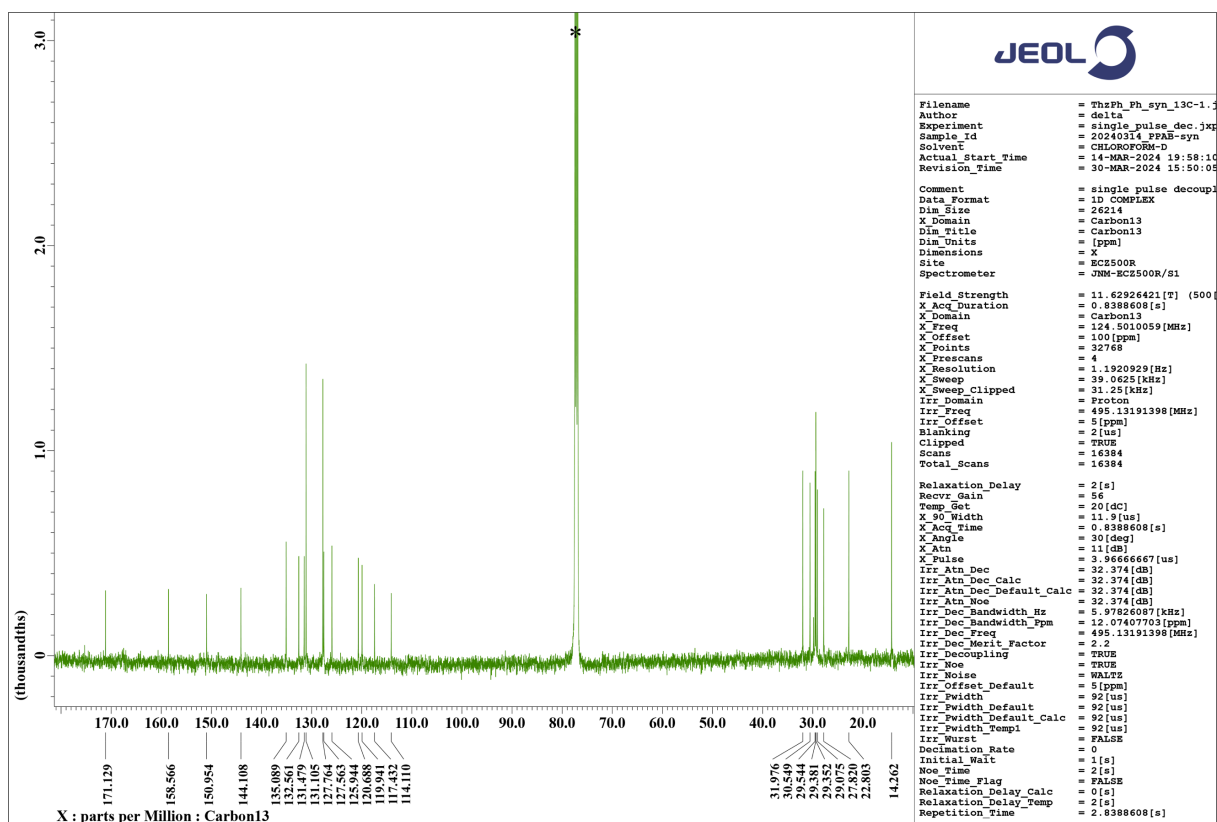

Fig. S9.  $^{13}\text{C}$  NMR spectrum of **4-syn** in  $\text{CDCl}_3$ . \* indicates a residual solvent signal.

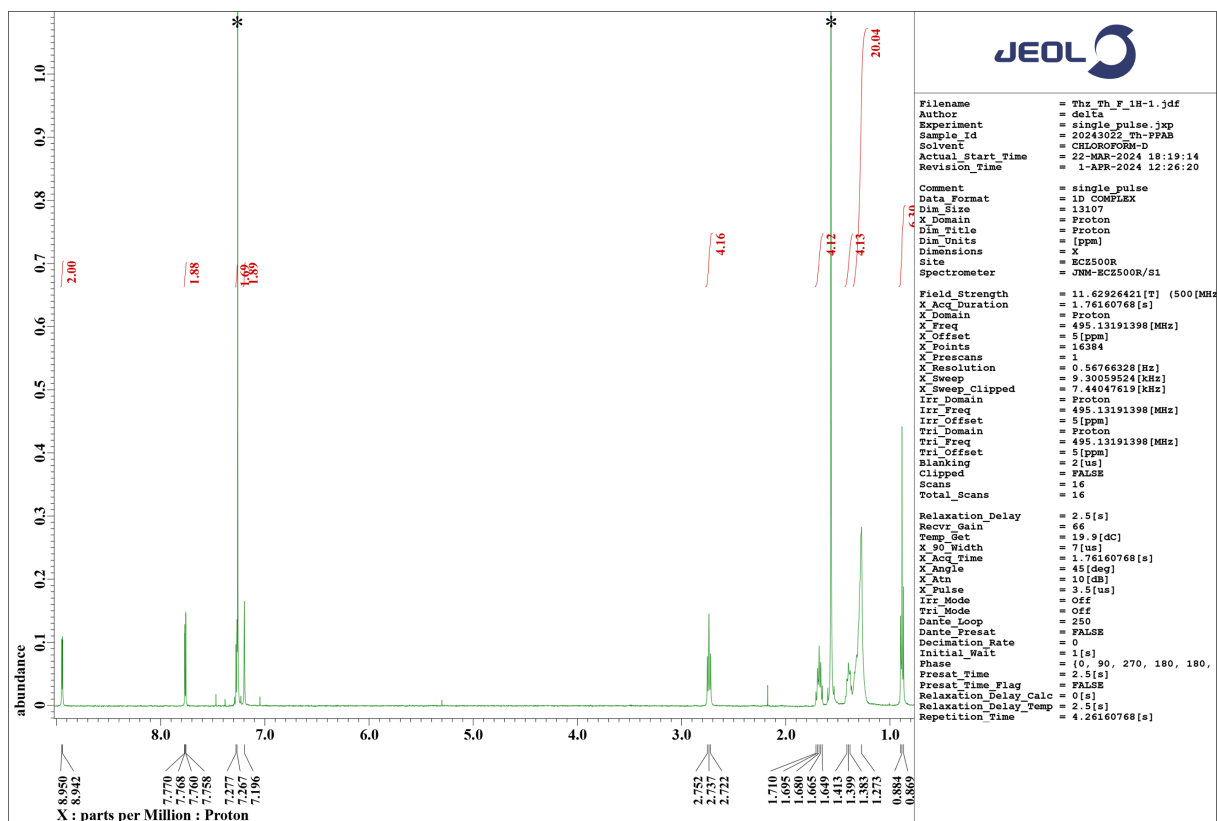

Fig. S10.  $^1\text{H}$  NMR spectrum of 6 in  $\text{CDCl}_3$ . \* indicates a residual solvent signal.

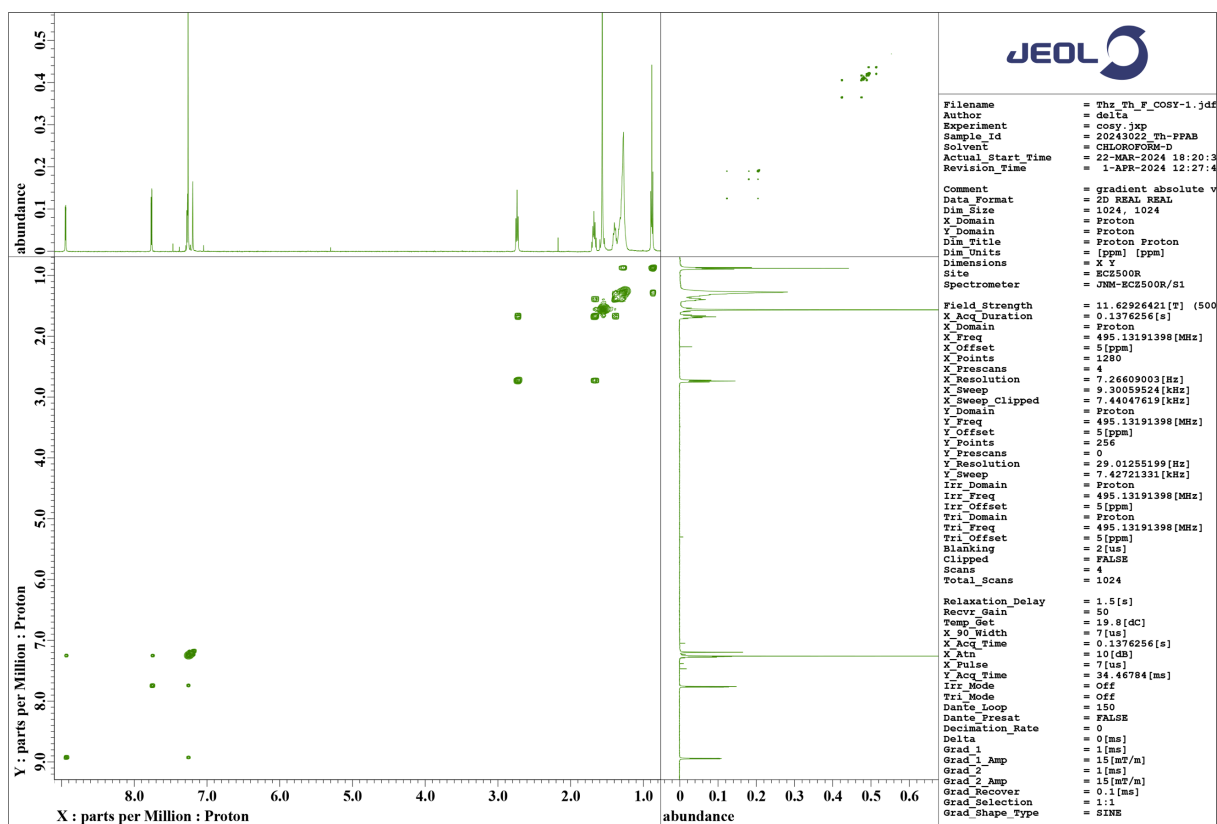

Fig. S11.  $^1\text{H}$ - $^1\text{H}$  COSY spectrum of 6 in  $\text{CDCl}_3$ .



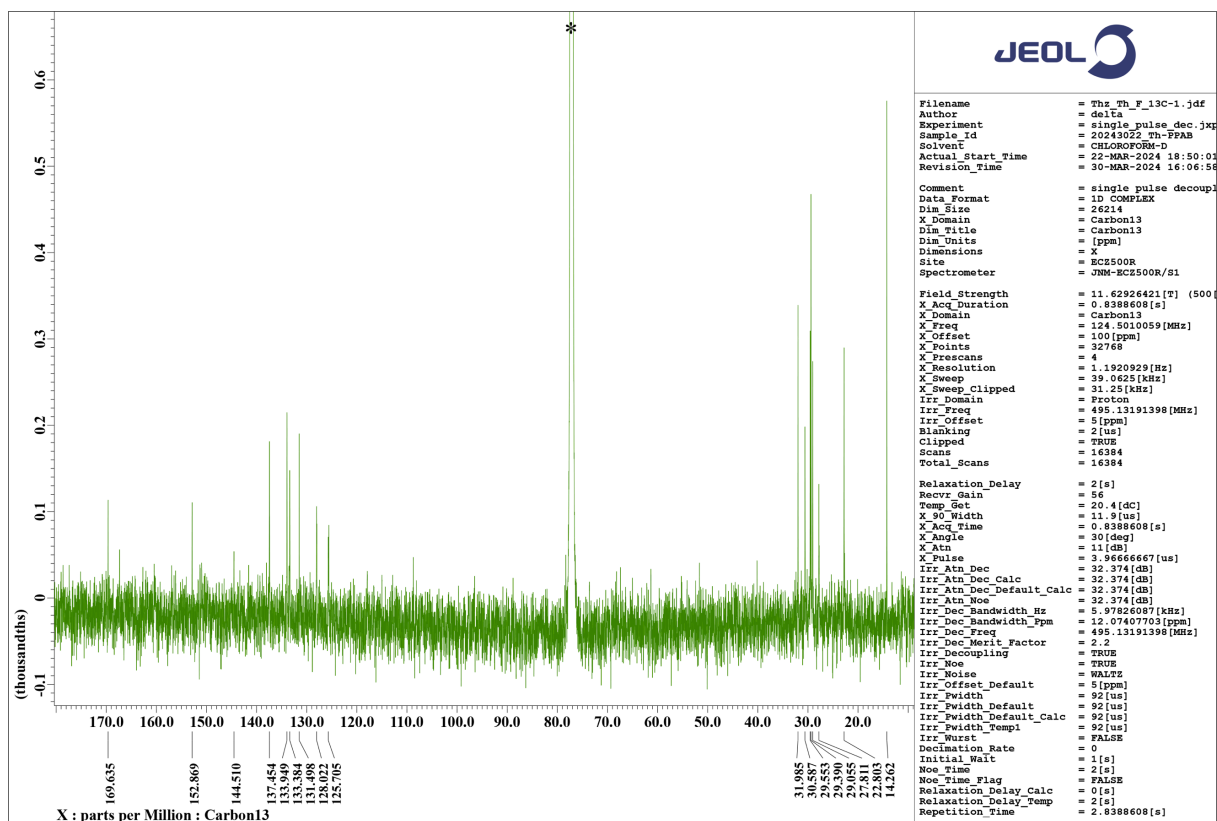

Fig. S12.  $^{13}\text{C}$  NMR spectrum of **6** in  $\text{CDCl}_3$ . \* indicates a residual solvent signal.

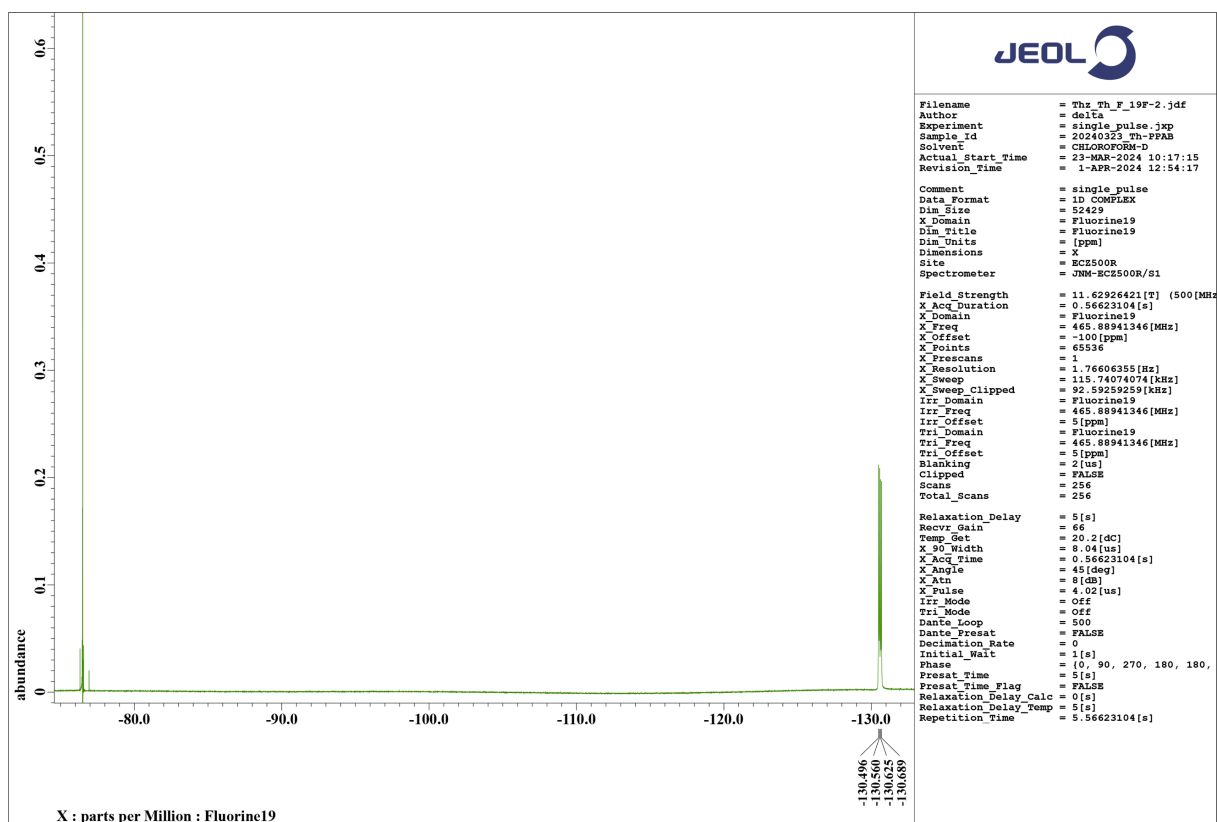

Fig. S13.  $^{19}\text{F}$  NMR spectrum of **6** in  $\text{CDCl}_3$ .

#### iv. Crystallographic Data

**Table S1.** Crystallographic data.

| Compound                                            | <i>4-anti</i>                                                                               | <b>6</b>                                                                                    |
|-----------------------------------------------------|---------------------------------------------------------------------------------------------|---------------------------------------------------------------------------------------------|
| Empirical formula                                   | C <sub>54</sub> H <sub>58</sub> B <sub>2</sub> N <sub>6</sub> O <sub>2</sub> S <sub>2</sub> | C <sub>38</sub> H <sub>46</sub> B <sub>2</sub> F <sub>4</sub> N <sub>6</sub> S <sub>4</sub> |
| Formula weight                                      | 908.80                                                                                      | 812.67                                                                                      |
| Temperature (K)                                     | 100                                                                                         | 100                                                                                         |
| Wavelength (Å)                                      | 0.71073 (MoKα)                                                                              | 0.71073 (MoKα)                                                                              |
| Crystal system                                      | monoclinic                                                                                  | triclinic                                                                                   |
| Space group                                         | <i>P</i> 2 <sub>1</sub> / <i>c</i> (no. 14)                                                 | $\bar{P}$ 1 (no. 2)                                                                         |
| Unit cell dimensions                                |                                                                                             |                                                                                             |
| <i>a</i> (Å)                                        | 20.7040(10)                                                                                 | 7.7011(3)                                                                                   |
| <i>b</i> (Å)                                        | 6.2953(3)                                                                                   | 11.6851(6)                                                                                  |
| <i>c</i> (Å)                                        | 18.9378(9)                                                                                  | 11.8911(6)                                                                                  |
| α (°)                                               | 90                                                                                          | 75.307(4)                                                                                   |
| β (°)                                               | 108.615(5)                                                                                  | 71.596(4)                                                                                   |
| γ (°)                                               | 90                                                                                          | 76.096(4)                                                                                   |
| Volume (Å <sup>3</sup> )                            | 2339.2(2)                                                                                   | 967.05(9)                                                                                   |
| <i>Z</i>                                            | 2                                                                                           | 1                                                                                           |
| Density (calcd.) (g/cm <sup>3</sup> )               | 1.290                                                                                       | 1.395                                                                                       |
| μ (mm <sup>-1</sup> )                               | 0.164                                                                                       | 0.303                                                                                       |
| <i>F</i> (000)                                      | 964                                                                                         | 426                                                                                         |
| Crystal size (mm <sup>3</sup> )                     | 0.26 × 0.10 × 0.01                                                                          | 0.22 × 0.05 × 0.01                                                                          |
| θ (°) for data collection                           | 2.076 to 30.797                                                                             | 1.830 to 27.989                                                                             |
| Index ranges                                        | -29 ≤ <i>h</i> ≤ 28                                                                         | -10 ≤ <i>h</i> ≤ 10                                                                         |
|                                                     | -8 ≤ <i>k</i> ≤ 9                                                                           | -15 ≤ <i>k</i> ≤ 15                                                                         |
|                                                     | -25 ≤ <i>l</i> ≤ 27                                                                         | -15 ≤ <i>l</i> ≤ 15                                                                         |
| Reflection collected                                | 47021                                                                                       | 18553                                                                                       |
| Unique reflections                                  | 6930 ( <i>R</i> <sub>int</sub> = 0.0645)                                                    | 4659 ( <i>R</i> <sub>int</sub> = 0.0560)                                                    |
| Completeness                                        | 0.949                                                                                       | 0.998                                                                                       |
| Absorption correction                               | multi-scan                                                                                  | multi-scan                                                                                  |
| Max. and min. transmission                          | 0.723, 1.000                                                                                | 0.663, 1.000                                                                                |
| Data/restraints/parameters                          | 6930/93/382                                                                                 | 4659/109/290                                                                                |
| Goodness-of-fit on <i>F</i> <sup>2</sup>            | 1.024                                                                                       | 1.038                                                                                       |
| Final <i>R</i> indices [ <i>I</i> > 2σ( <i>I</i> )] | 0.0715                                                                                      | 0.0476                                                                                      |
| <i>wR</i> <sup>2</sup> indices (all data)           | 0.1744                                                                                      | 0.1065                                                                                      |
| Large diff. peak and hole                           | 0.39, -0.46                                                                                 | 0.32, -0.35                                                                                 |
| CCDC number                                         | 2342651                                                                                     | 2343541                                                                                     |

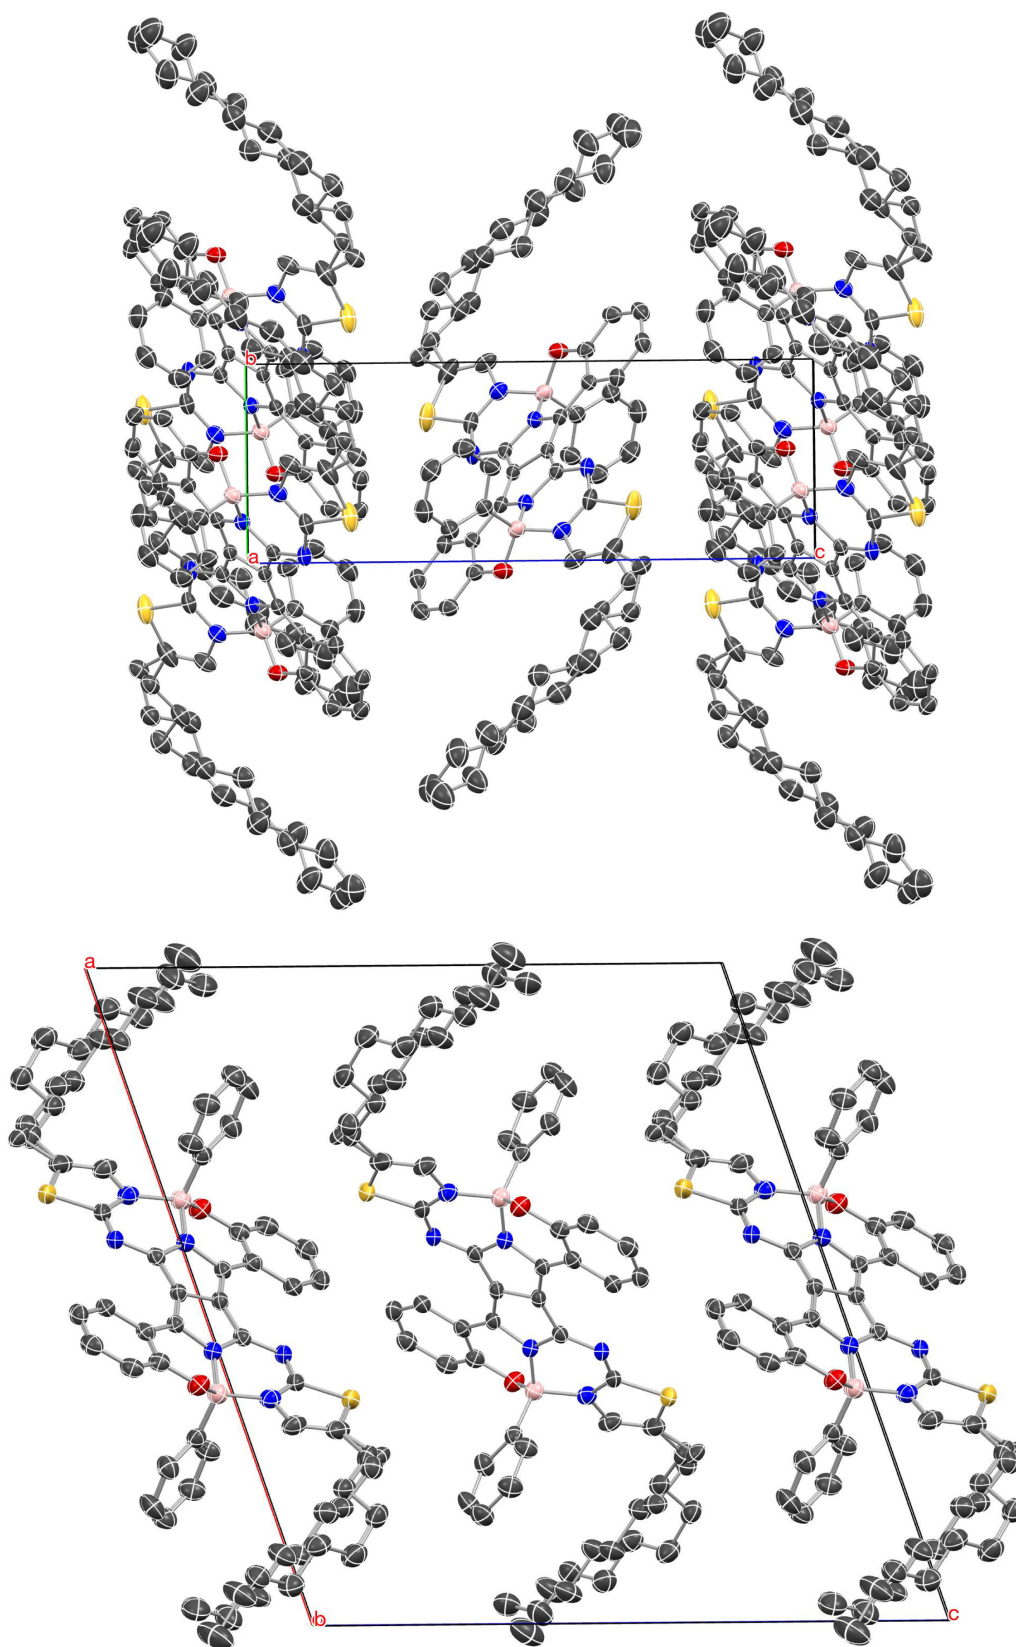

**Fig. S14.** Packing diagram of *4-anti*. The thermal ellipsoids are scaled to the 50% probability. Hydrogen atoms are omitted for clarity.

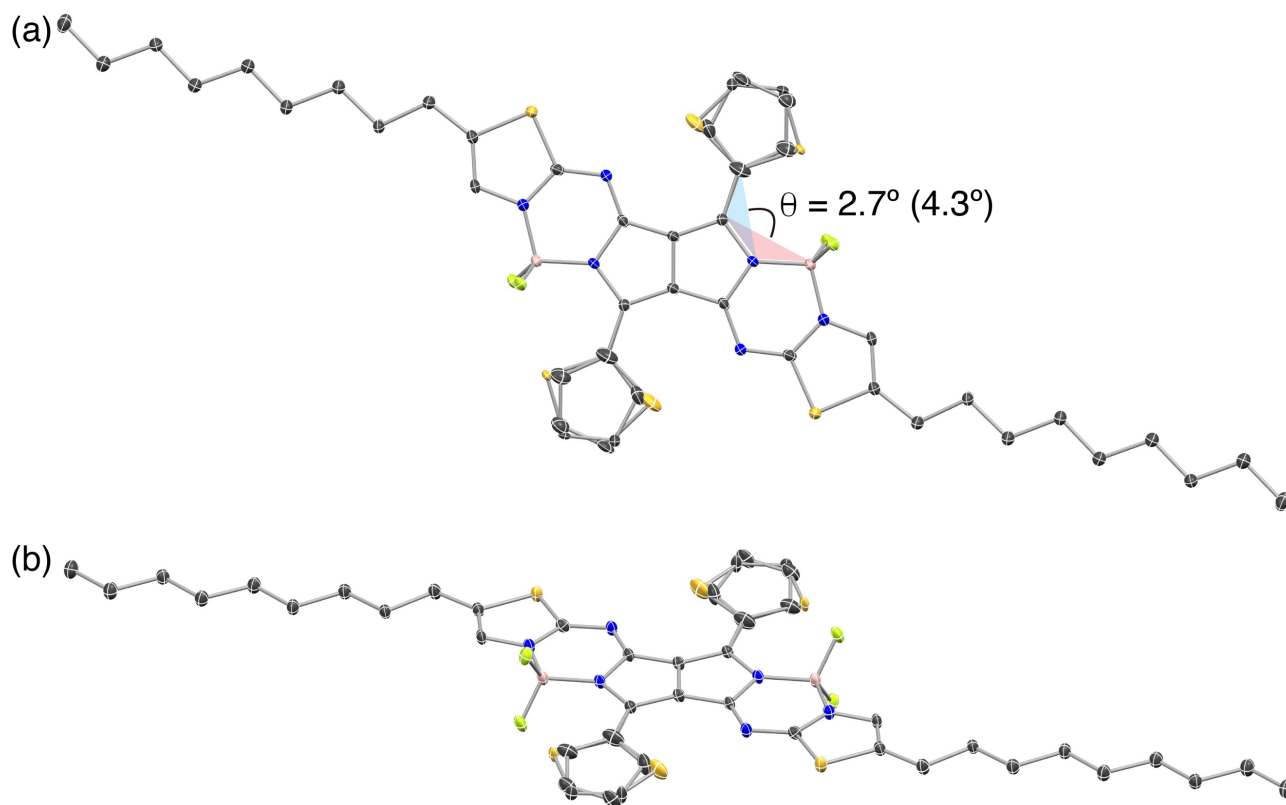

**Fig. S15.** X-Ray single-crystal structure of 6, (a) top and (b) side views. The thermal ellipsoids are scaled to the 50% probability. Hydrogen atoms are omitted for clarity. The dihedral angle of the thienyl substituents with minor occupancy is shown in the parenthesis.

## v. UV/vis Absorption, Excitation and Fluorescence Spectra

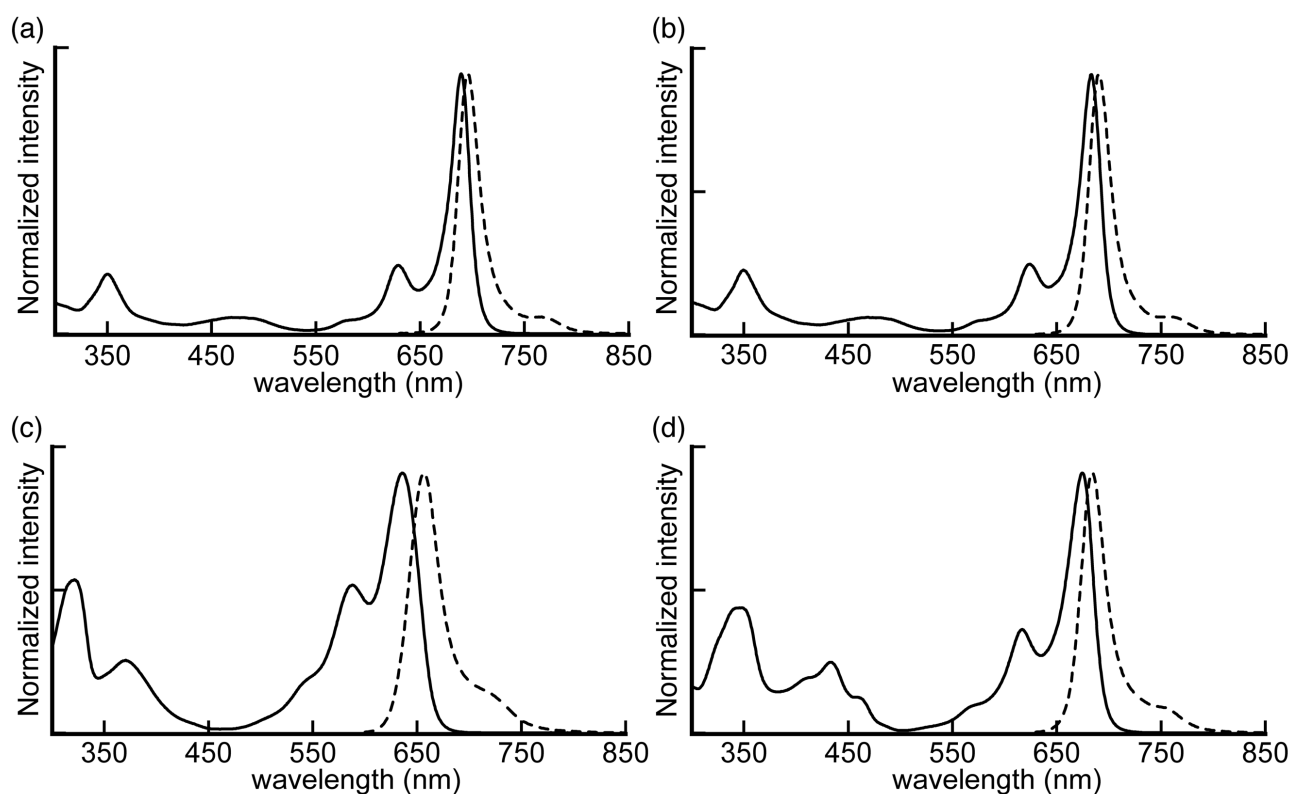

**Fig. S16.** Excitation (solid line) and fluorescence (dashed line) spectra of (a) *4-anti*, (b) *4-syn*, (c) **5** and (d) **6** in dichloromethane. The fluorescence spectra were measured by excitation at 550 nm for **5** and 600 nm for *4-anti*, *4-syn* and **6**. The excitation spectra were measured by monitoring the fluorescence intensities at 697 nm for *4-anti*, 691 nm for *4-syn*, 657 nm for **5** and 685 nm for **6**.

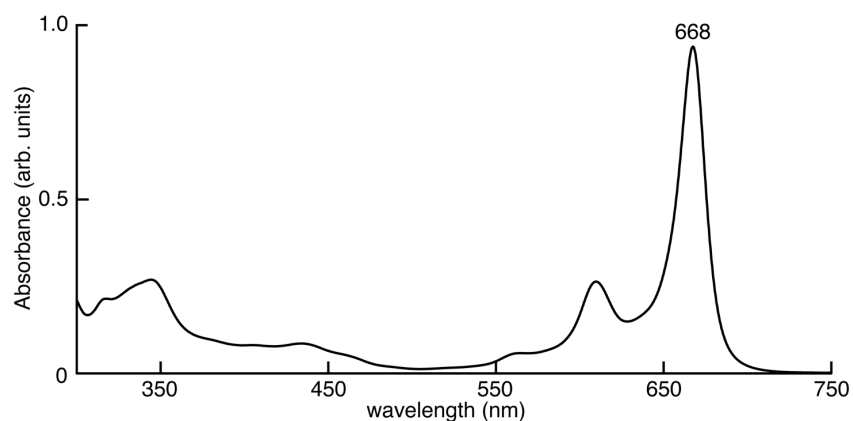

**Fig. S17.** UV/vis absorption spectrum of **3** in dichloromethane.

## vi. Electrochemistry

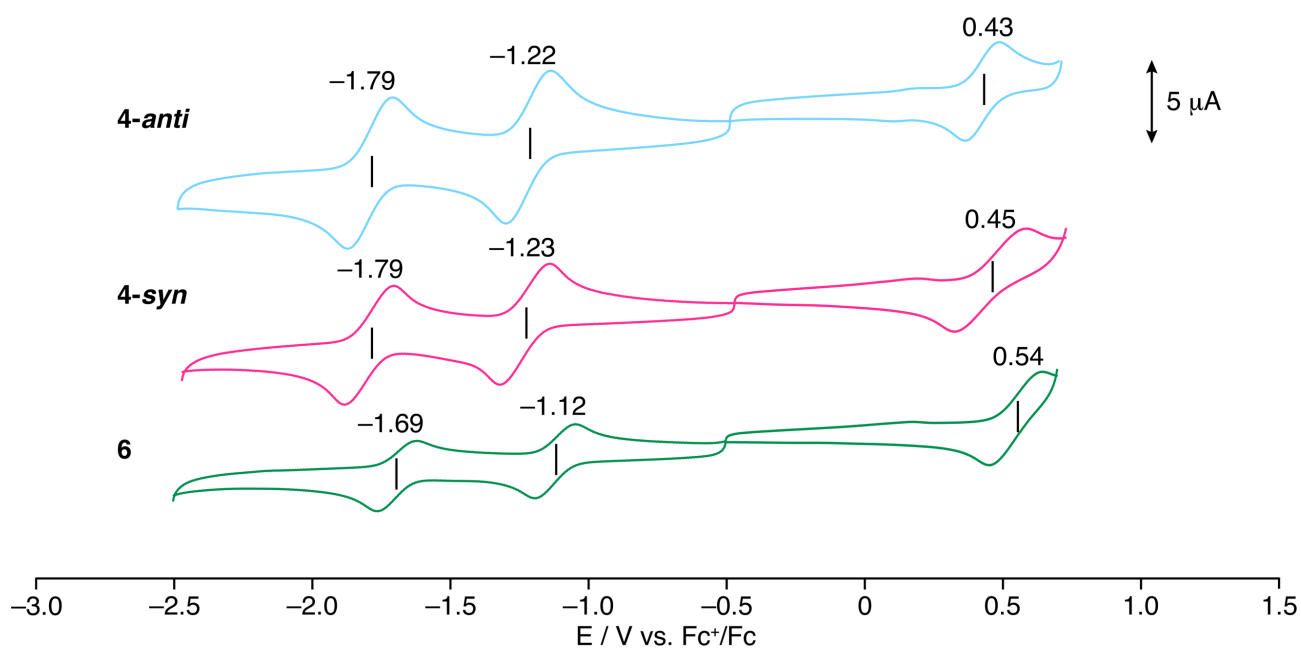

**Fig. S18.** Cyclic voltammograms of **4-anti**, **4-syn** and **6** (0.5 mM) in *o*-DCB containing 0.1 M TBAP at scan rate of 100 mV s<sup>-1</sup>.

**Table S2.** Summary of electrochemical properties of **4-anti**, **4-syn**, **5** and **6**.

| Compound                | $E_{ox}^{1/2}$ [V]  | $E_{red1}^{1/2}$ [V] | $E_{red2}^{1/2}$ [V] | $\Delta E^{[a]}$ [V] |
|-------------------------|---------------------|----------------------|----------------------|----------------------|
| <b>4-anti</b>           | 0.43                | -1.22                | -1.79                | 1.65                 |
| <b>4-syn</b>            | 0.45                | -1.23                | -1.79                | 1.68                 |
| <b>5</b> <sup>[b]</sup> | 0.69 <sup>[c]</sup> | -1.13                |                      | 1.82                 |
| <b>6</b>                | 0.54                | -1.12                | -1.69                | 1.66                 |

[a]  $\Delta E = E_{ox}^{1/2} - E_{red1}^{1/2}$ . [b] From ref. 10. [c] Potential was determined from the differential pulse voltammogram.

## vii. DFT and TDDFT Calculations

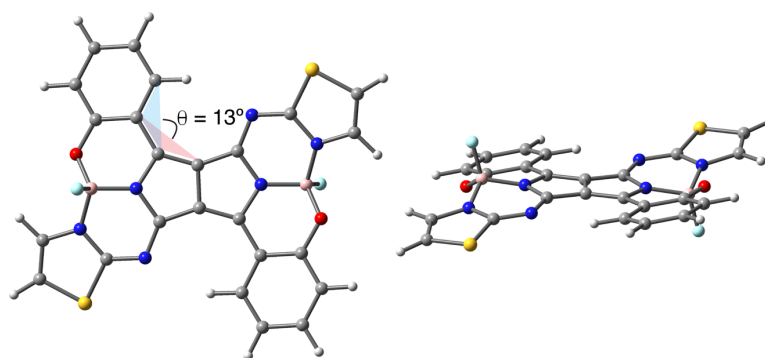

**Fig. S19.** Optimized structures of **3M-anti** (left: top view and right: side view) at the  $S_0$  state at the  $\omega$ B97XD/6-31G(d) level.

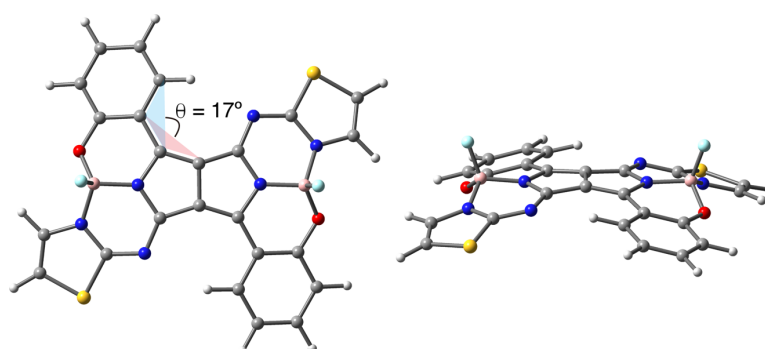

**Fig. S20.** Optimized structures of **3M-syn** (left: top view and right: side view) at the  $S_0$  state at the  $\omega$ B97XD/6-31G(d) level.

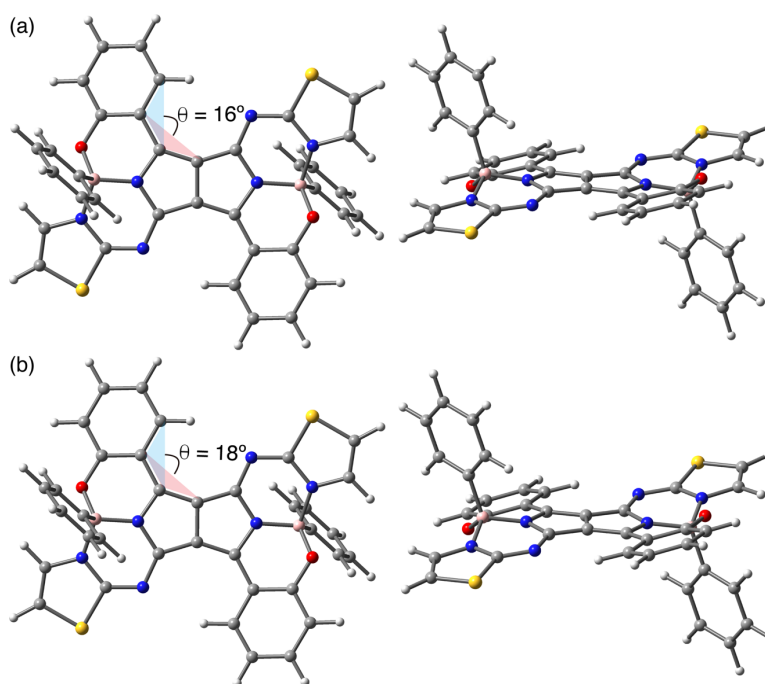

**Fig. S21.** Optimized structures of **4M-anti** (left: top view and right: side view) at the (a)  $S_0$  and (b)  $S_1$  states at the  $\omega$ B97XD/6-31G(d) level.

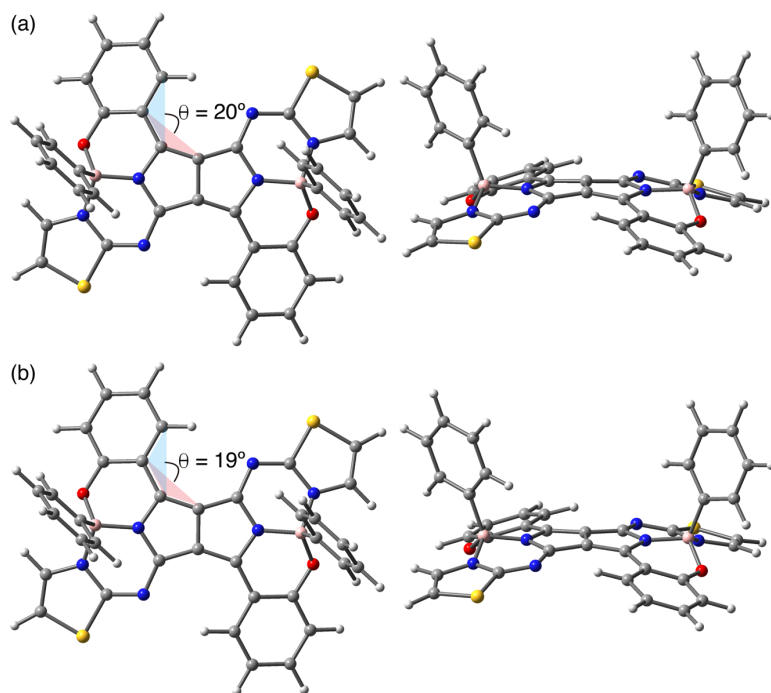

**Fig. S22.** Optimized structures of 4M-syn (left: top view and right: side view) at the (a)  $S_0$  and (b)  $S_1$  states at the  $\omega$ B97XD/6-31G(d) level.

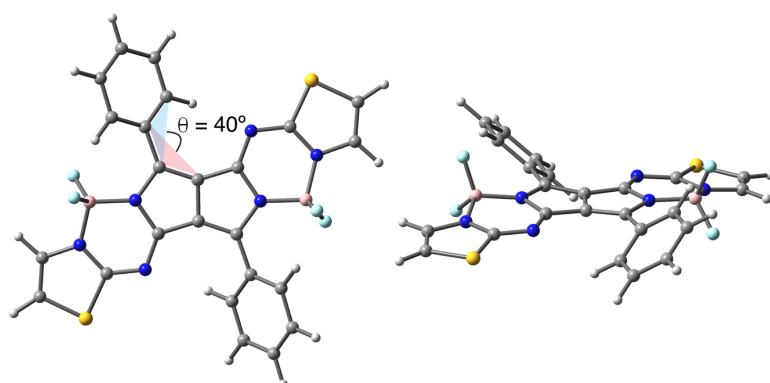

**Fig. S23.** Optimized structures of 5M (left: top view and right: side view) at the  $S_0$  state at the  $\omega$ B97XD/6-31G(d) level.

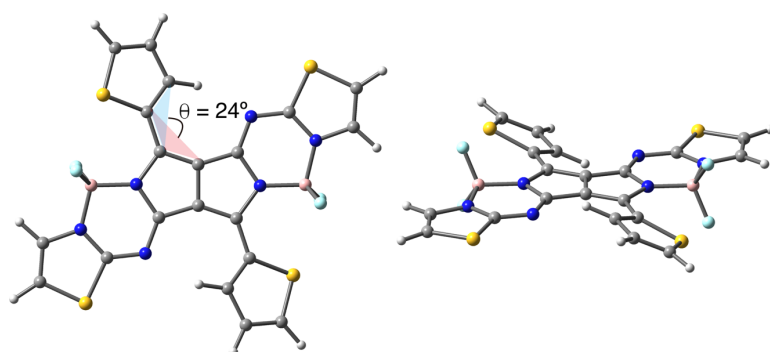

**Fig. S24.** Optimized structures of 6M (left: top view and right: side view) at the  $S_0$  state at the  $\omega$ B97XD/6-31G(d) level.



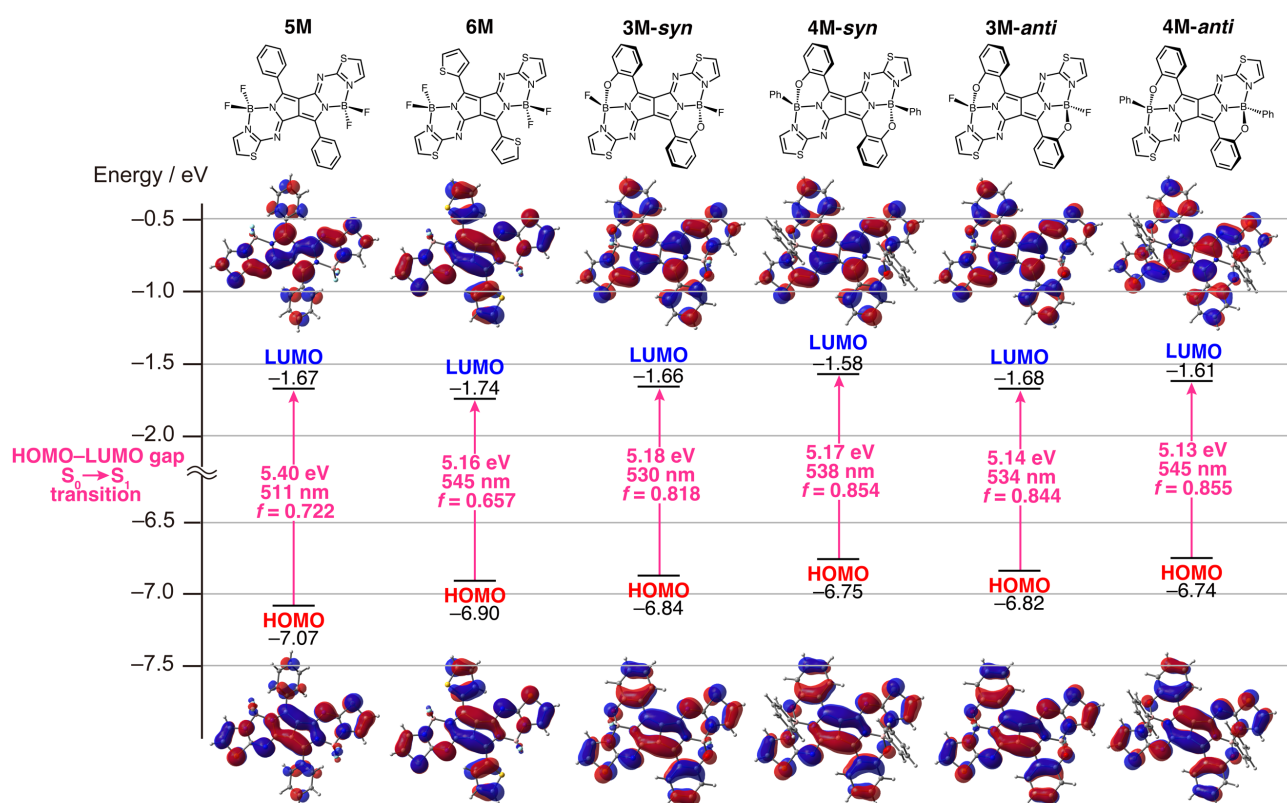

**Fig. S25.** Frontier molecular orbital diagrams of **3M-anti**, **3M-syn**, **4M-anti**, **4M-syn**, **5M** and **6M** at the  $\omega$ B97XD/6-31G(d) level of theory. HOMO-LUMO energy gaps and  $S_0$ -to- $S_1$  transitions estimated by the TDDFT calculations at the  $\omega$ B97XD/6-31G(d) level of theory are shown.

**Table S3.** Selected transition energies, oscillator strength and major contributions of **3M-anti** calculated by the TDDFT method ( $\omega$ B97XD/6-31G(d)). The  $S_0$ -to- $S_1$  transition is highlighted in bold.

|                                         | wavelength [nm] | $f$ [a]      | Major contributions (weight%) [b]                                                        |
|-----------------------------------------|-----------------|--------------|------------------------------------------------------------------------------------------|
| <b><math>S_0 \rightarrow S_1</math></b> | <b>534</b>      | <b>0.844</b> | <b>HOMO <math>\rightarrow</math> LUMO (98%)</b>                                          |
| $S_0 \rightarrow S_2$                   | 404             | 0.000        | H-5 $\rightarrow$ LUMO (63%), H-1 $\rightarrow$ LUMO (27%)                               |
| $S_0 \rightarrow S_3$                   | 353             | 0.000        | H-5 $\rightarrow$ LUMO (31%), H-1 $\rightarrow$ LUMO (51%), HOMO $\rightarrow$ L+1 (11%) |
| $S_0 \rightarrow S_4$                   | 352             | 0.227        | H-2 $\rightarrow$ LUMO (91%)                                                             |
| $S_0 \rightarrow S_5$                   | 324             | 0.000        | H-3 $\rightarrow$ LUMO (32%), H-1 $\rightarrow$ LUMO (13%), HOMO $\rightarrow$ L+1 (47%) |

[a] Oscillator strength. [b] H and L denote the HOMO and LUMO, respectively.

**Table S4.** Selected transition energies, oscillator strength and major contributions of **3M-syn** calculated by the TDDFT method ( $\omega$ B97XD/6-31G(d)). The  $S_0$ -to- $S_1$  transition is highlighted in bold.

|                                         | wavelength [nm] | $f$ [a]      | Major contributions (weight%) [b]                                                        |
|-----------------------------------------|-----------------|--------------|------------------------------------------------------------------------------------------|
| <b><math>S_0 \rightarrow S_1</math></b> | <b>530</b>      | <b>0.818</b> | <b>HOMO <math>\rightarrow</math> LUMO (98%)</b>                                          |
| $S_0 \rightarrow S_2$                   | 397             | 0.000        | H-5 $\rightarrow$ LUMO (60%), H-1 $\rightarrow$ LUMO (29%)                               |
| $S_0 \rightarrow S_3$                   | 351             | 0.000        | H-5 $\rightarrow$ LUMO (34%), H-1 $\rightarrow$ LUMO (48%), HOMO $\rightarrow$ L+1 (11%) |
| $S_0 \rightarrow S_4$                   | 350             | 0.222        | H-2 $\rightarrow$ LUMO (90%)                                                             |
| $S_0 \rightarrow S_5$                   | 324             | 0.005        | H-3 $\rightarrow$ LUMO (30%), H-1 $\rightarrow$ LUMO (14%), HOMO $\rightarrow$ L+1 (48%) |

[a] Oscillator strength. [b] H and L denote the HOMO and LUMO, respectively.

**Table S5.** Selected transition energies, oscillator strength and major contributions of **4M-anti** calculated by the TDDFT method ( $\omega$ B97XD/6-31G(d)). The  $S_0$ -to- $S_1$  transition is highlighted in bold.

|                                         | wavelength [nm] | $f^{[a]}$    | Major contributions (weight%) <sup>[b]</sup>               |
|-----------------------------------------|-----------------|--------------|------------------------------------------------------------|
| <b><math>S_0 \rightarrow S_1</math></b> | <b>545</b>      | <b>0.855</b> | <b>HOMO <math>\rightarrow</math> LUMO (97%)</b>            |
| $S_0 \rightarrow S_2$                   | 419             | 0.000        | H-9 $\rightarrow$ LUMO (69%), H-3 $\rightarrow$ LUMO (25%) |
| $S_0 \rightarrow S_3$                   | 388             | 0.000        | H-1 $\rightarrow$ LUMO (84%)                               |
| $S_0 \rightarrow S_4$                   | 387             | 0.176        | H-2 $\rightarrow$ LUMO (92%)                               |
| $S_0 \rightarrow S_5$                   | 328             | 0.000        | H-7 $\rightarrow$ LUMO (25%), HOMO $\rightarrow$ L+1 (56%) |

[a] Oscillator strength. [b] H and L denote the HOMO and LUMO, respectively.

**Table S6.** Selected transition energies, oscillator strength and major contributions of **4M-syn** calculated by the TDDFT method ( $\omega$ B97XD/6-31G(d)). The  $S_0$ -to- $S_1$  transition is highlighted in bold.

|                                         | wavelength [nm] | $f^{[a]}$    | Major contributions (weight%) <sup>[b]</sup>               |
|-----------------------------------------|-----------------|--------------|------------------------------------------------------------|
| <b><math>S_0 \rightarrow S_1</math></b> | <b>538</b>      | <b>0.854</b> | <b>HOMO <math>\rightarrow</math> LUMO (97%)</b>            |
| $S_0 \rightarrow S_2$                   | 411             | 0.000        | H-9 $\rightarrow$ LUMO (65%), H-3 $\rightarrow$ LUMO (28%) |
| $S_0 \rightarrow S_3$                   | 386             | 0.000        | H-1 $\rightarrow$ LUMO (83%)                               |
| $S_0 \rightarrow S_4$                   | 384             | 0.172        | H-2 $\rightarrow$ LUMO (92%)                               |
| $S_0 \rightarrow S_5$                   | 327             | 0.004        | H-7 $\rightarrow$ LUMO (23%), HOMO $\rightarrow$ L+1 (57%) |

[a] Oscillator strength. [b] H and L denote the HOMO and LUMO, respectively.

**Table S7.** Selected transition energies, oscillator strength and major contributions of **5M** calculated by the TDDFT method ( $\omega$ B97XD/6-31G(d)). The  $S_0$ -to- $S_1$  transition is highlighted in bold.

|                                         | wavelength [nm] | $f^{[a]}$    | Major contributions (weight%) <sup>[b]</sup>                                             |
|-----------------------------------------|-----------------|--------------|------------------------------------------------------------------------------------------|
| <b><math>S_0 \rightarrow S_1</math></b> | <b>511</b>      | <b>0.722</b> | <b>HOMO <math>\rightarrow</math> LUMO (97%)</b>                                          |
| $S_0 \rightarrow S_2$                   | 386             | 0.000        | H-6 $\rightarrow$ LUMO (16%), H-5 $\rightarrow$ LUMO (69%), H-1 $\rightarrow$ LUMO (10%) |
| $S_0 \rightarrow S_3$                   | 333             | 0.005        | H-1 $\rightarrow$ LUMO (60%), HOMO $\rightarrow$ L+1 (20%)                               |
| $S_0 \rightarrow S_4$                   | 315             | 0.691        | H-2 $\rightarrow$ LUMO (92%)                                                             |
| $S_0 \rightarrow S_5$                   | 299             | 0.012        | H-3 $\rightarrow$ LUMO (86%)                                                             |

[a] Oscillator strength. [b] H and L denote the HOMO and LUMO, respectively.

**Table S8.** Selected transition energies, oscillator strength and major contributions of **6M** calculated by the TDDFT method ( $\omega$ B97XD/6-31G(d)). The  $S_0$ -to- $S_1$  transition is highlighted in bold.

|                                         | wavelength [nm] | $f^{[a]}$    | Major contributions (weight%) <sup>[b]</sup>                                                                           |
|-----------------------------------------|-----------------|--------------|------------------------------------------------------------------------------------------------------------------------|
| <b><math>S_0 \rightarrow S_1</math></b> | <b>545</b>      | <b>0.657</b> | <b>HOMO <math>\rightarrow</math> LUMO (98%)</b>                                                                        |
| $S_0 \rightarrow S_2$                   | 389             | 0.000        | H-6 $\rightarrow$ LUMO (16%), H-5 $\rightarrow$ LUMO (50%), H-1 $\rightarrow$ LUMO (22%)                               |
| $S_0 \rightarrow S_3$                   | 346             | 0.000        | H-6 $\rightarrow$ LUMO (13%), H-5 $\rightarrow$ LUMO (14%), H-1 $\rightarrow$ LUMO (42%), HOMO $\rightarrow$ L+1 (26%) |
| $S_0 \rightarrow S_4$                   | 344             | 0.710        | H-2 $\rightarrow$ LUMO (93%)                                                                                           |
| $S_0 \rightarrow S_5$                   | 308             | 0.000        | H-1 $\rightarrow$ LUMO (29%), HOMO $\rightarrow$ L+1 (59%)                                                             |

[a] Oscillator strength. [b] H and L denote the HOMO and LUMO, respectively.

viii. Estimation of Dissymmetry Factors of Theoretical CD and CPL

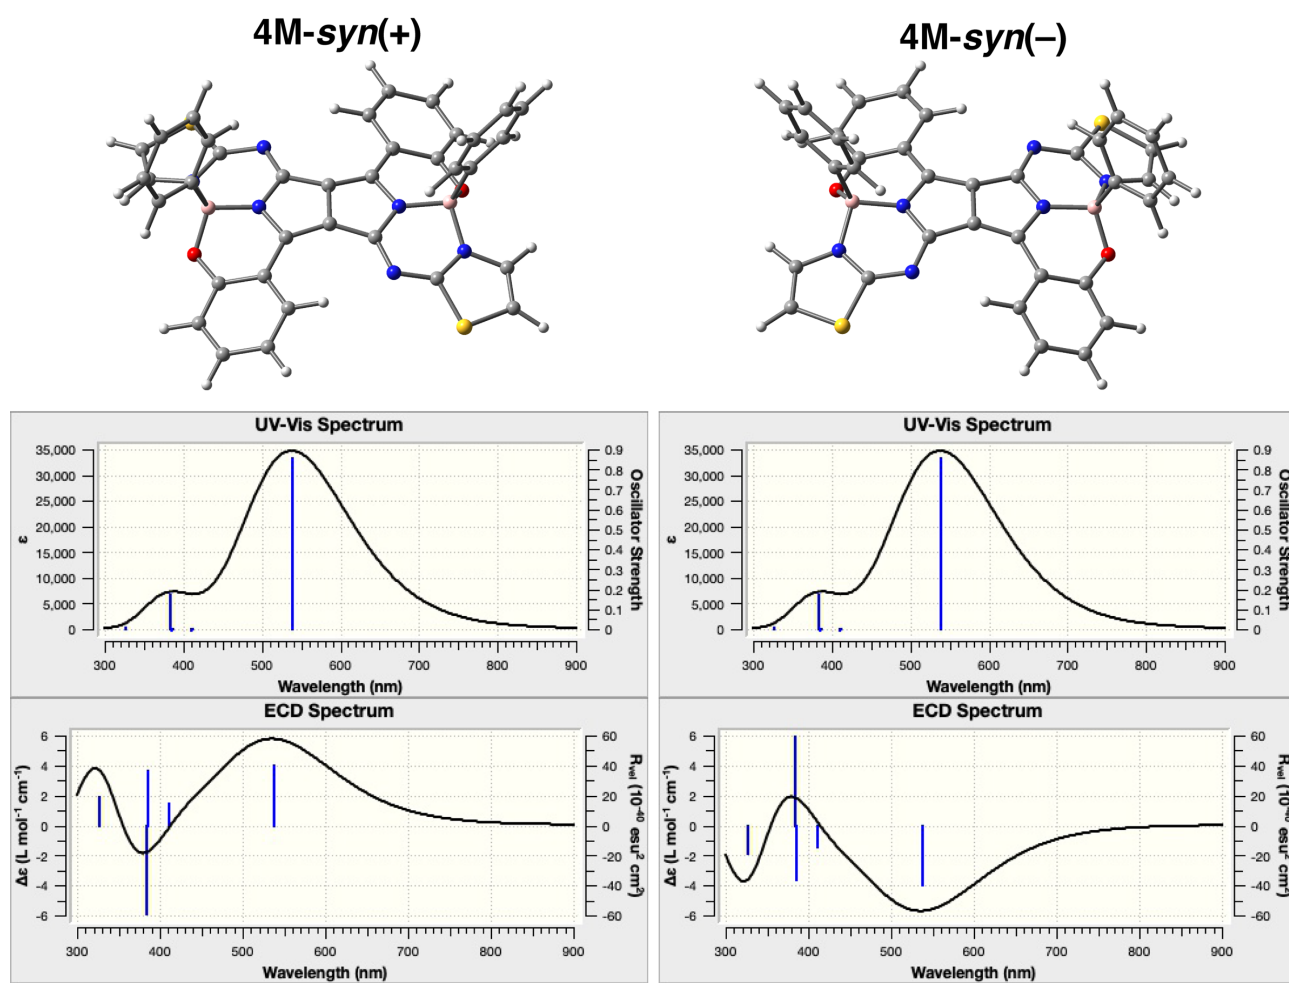

Fig. S26. Theoretical UV/vis absorption (top) and CD (bottom) spectra of **4M-syn(+)** (left) and **4M-syn(-)** (right) at the  $\omega$ B97XD/6-31G(d) level of theory.

Transition electric (TEDM) and transition magnetic (TMDM) dipole moments were generated from the TDDFT data by Multiwfn<sup>11</sup> and visualized by VMD.<sup>12</sup>

**Table S9.** S<sub>0</sub>-to-S<sub>1</sub> transition properties of **4M-syn(+)** calculated by the TDDFT method (ωB97XD/6-31G(d)). In the structure of **4M-syn(+)** at the S<sub>0</sub> state, the spatial arrangement of the transition electric and magnetic dipole moment vectors for the S<sub>0</sub>-to-S<sub>1</sub> transition is shown.

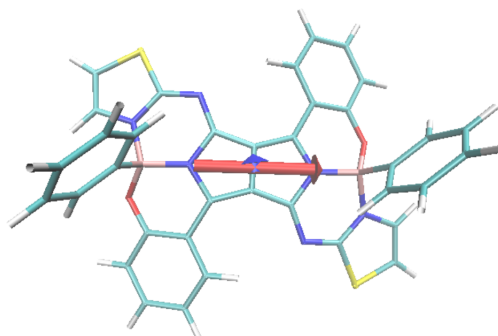

|                                   | $\lambda^{[a]}$<br>[nm] | $\mu^{[b]}$<br>[10 <sup>-18</sup> esu·cm] | $m^{[c]}$<br>[10 <sup>-21</sup> erg·G <sup>-1</sup> ] | $\theta_{\mu,m}^{[d]}$<br>[°] | $R^{[e]}$<br>[10 <sup>-39</sup> esu·erg·cm·G <sup>-1</sup> ] | $g_{CD}$                |
|-----------------------------------|-------------------------|-------------------------------------------|-------------------------------------------------------|-------------------------------|--------------------------------------------------------------|-------------------------|
| S <sub>0</sub> -to-S <sub>1</sub> | 538                     | 9.89                                      | 2.71                                                  | 80.8                          | 4.29                                                         | 1.75 × 10 <sup>-4</sup> |

[a] Wavelength. [b] TEDM. [c] TMDM. [d] Angle of TEDM and TMDM. [e] Rotatory strength defined as  $R = |\mu| \cdot |m| \cdot \cos \theta_{\mu,m}$ .

**Table S10.** S<sub>1</sub>-to-S<sub>0</sub> detransition properties of **4M-syn(+)** calculated by the TDDFT method (ωB97XD/6-31G(d)). In the structure of **4M-syn(+)** at the S<sub>1</sub> state, the spatial arrangement of the transition electric and magnetic dipole moment vectors for the S<sub>1</sub>-to-S<sub>0</sub> detransition is shown.

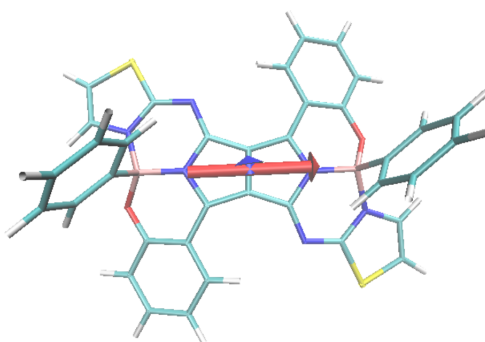

|                                   | $\lambda^{[a]}$<br>[nm] | $\mu^{[b]}$<br>[10 <sup>-18</sup> esu·cm] | $m^{[c]}$<br>[10 <sup>-21</sup> erg·G <sup>-1</sup> ] | $\theta_{\mu,m}^{[d]}$<br>[°] | $R^{[e]}$<br>[10 <sup>-39</sup> esu·erg·cm·G <sup>-1</sup> ] | $g_{CPL}$               |
|-----------------------------------|-------------------------|-------------------------------------------|-------------------------------------------------------|-------------------------------|--------------------------------------------------------------|-------------------------|
| S <sub>1</sub> -to-S <sub>0</sub> | 567                     | 10.1                                      | 3.08                                                  | 84.1                          | 3.22                                                         | 1.26 × 10 <sup>-4</sup> |

[a] Wavelength. [b] TEDM. [c] TMDM. [d] Angle of TEDM and TMDM. [e] Rotatory strength defined as  $R = |\mu| \cdot |m| \cdot \cos \theta_{\mu,m}$ .

## ix. References

1. T. Harada, H. Hayakawa, M. Watanabe, M. Takamoto, *Rev. Sci. Instrum.*, 2016, **87**, 075102.
2. JASCO Co. Ltd., CPL technical note, Ishikawa, Hachioji, Tokyo, 2006.
3. G. Sheldrick, *Acta Crystallogr. Sect. A*, 2015, **71**, 3–8.
4. G. Sheldrick, *Acta Crystallographica Section C*, 2015, **71**, 3–8.
5. M. J. Frisch, G. W. Trucks, H. B. Schlegel, G. E. Scuseria, M. A. Robb, J. R. Cheeseman, G. Scalmani, V. Barone, G. A. Petersson, H. Nakatsuji, X. Li, M. Caricato, A. V. Marenich, J. Bloino, B. G. Janesko, R. Gomperts, B. Mennucci, H. P. Hratchian, J. V. Ortiz, A. F. Izmaylov, J. L. Sonnenberg, D. Williams-Young, F. Ding, F. Lipparini, F. Egidi, J. Goings, B. Peng, A. Petrone, T. Henderson, D. Ranasinghe, V. G. Zakrzewski, J. Gao, N. Rega, G. Zheng, W. Liang, M. Hada, M. Ehara, K. Toyota, R. Fukuda, J. Hasegawa, M. Ishida, T. Nakajima, Y. Honda, O. Kitao, H. Nakai, T. Vreven, K. Throssell, J. A. Montgomery, Jr., J. E. Peralta, F. Ogliaro, M. J. Bearpark, J. J. Heyd, E. N. Brothers, K. N. Kudin, V. N. Staroverov, T. A. Keith, R. Kobayashi, J. Normand, K. Raghavachari, A. P. Rendell, J. C. Burant, S. S. Iyengar, J. Tomasi, M. Cossi, J. M. Millam, M. Klene, C. Adamo, R. Cammi, J. W. Ochterski, R. L. Martin, K. Morokuma, O. Farkas, J. B. Foresman and D. J. Fox, *Gaussian 16 Rev. C.01*, (2019), Wallingford, CT.
6. J. D. Chai and M. Head-Gordon, *Phys. Chem. Chem. Phys.* 2008, **10**, 6615–6620.
7. B. P. Pritchard, D. Altarawy, B. Didier, T. D. Gibson and T. L. Windus, *J. Chem. Inf. Model.*, 2019, **59**, 4814–4820.
8. H. Langhals, T. Potrawa, H. Nöth and G. Linti, *Angew. Chem. Int. Ed. Engl.*, 1989, **28**, 478–480.
9. Z. Xiao, J. Subbiah, K. Sun, S. Ji, D. J. Jones, A. B. Holmes and W. W. H. Wong, *J. Mater. Chem. C* 2014, **2**, 1306–1313.
10. Y. Kage, S. Kang, S. Mori, M. Mamada, C. Adachi, D. Kim, H. Furuta and S. Shimizu, *Chem. Eur. J.* 2021, **27**, 5259–5267.
11. T. Lu and F. Chen, *J. Comput. Chem.* 2012, **33**, 580–592.
12. W. Humphrey, A. Dalke and K. Schulten, *J. Molec. Graphics* 1996, **14**, 33–38.

## x. Appendix

**Table Appx-1.** Cartesian coordinates of the DFT optimized geometry of **3M-anti** at the ground state calculated at the level of  $\omega$ B97XD/6-31G(d).

Imaginary Freq: 0

Total Energy (Hartree): -2446.3001

|    | Symbol | X      | Y      | Z      |    | Symbol | X      | Y      | Z      |
|----|--------|--------|--------|--------|----|--------|--------|--------|--------|
| 1  | S      | -4.626 | -3.166 | -0.391 | 26 | O      | -3.925 | 1.819  | -0.113 |
| 2  | F      | 3.742  | -0.692 | -1.93  | 27 | N      | 2.24   | 2.031  | -0.046 |
| 3  | N      | -2.24  | -2.031 | 0.046  | 28 | N      | -2.068 | 0.322  | 0.228  |
| 4  | N      | 2.068  | -0.322 | -0.228 | 29 | N      | 4.241  | 0.677  | -0.03  |
| 5  | N      | -4.241 | -0.677 | 0.03   | 30 | H      | -3.092 | 6.204  | -0.565 |
| 6  | H      | 3.092  | -6.204 | 0.565  | 31 | C      | 1.506  | 0.925  | -0.125 |
| 7  | C      | -1.506 | -0.925 | 0.125  | 32 | C      | -1.647 | 2.664  | 0.006  |
| 8  | C      | 1.647  | -2.664 | -0.006 | 33 | C      | -0.79  | 3.776  | -0.055 |
| 9  | C      | 0.79   | -3.776 | 0.055  | 34 | H      | 0.281  | 3.615  | 0.045  |
| 10 | H      | -0.281 | -3.615 | -0.045 | 35 | C      | -1.137 | 1.323  | 0.103  |
| 11 | C      | 1.137  | -1.323 | -0.103 | 36 | C      | 0.105  | 0.713  | -0.011 |
| 12 | C      | -0.105 | -0.713 | 0.01   | 37 | C      | -1.303 | 5.043  | -0.251 |
| 13 | C      | 1.303  | -5.043 | 0.251  | 38 | H      | -0.64  | 5.901  | -0.293 |
| 14 | H      | 0.64   | -5.901 | 0.293  | 39 | C      | -2.685 | 5.21   | -0.405 |
| 15 | C      | 2.685  | -5.21  | 0.405  | 40 | C      | 3.558  | 1.838  | 0.055  |
| 16 | C      | -3.558 | -1.838 | -0.055 | 41 | C      | -3.051 | 2.839  | -0.139 |
| 17 | C      | 3.051  | -2.839 | 0.139  | 42 | C      | -3.547 | 4.127  | -0.355 |
| 18 | O      | 3.925  | -1.819 | 0.113  | 43 | H      | -4.619 | 4.251  | -0.471 |
| 19 | C      | 3.547  | -4.127 | 0.355  | 44 | C      | 5.6    | 0.821  | 0.165  |
| 20 | H      | 4.619  | -4.251 | 0.471  | 45 | H      | 6.224  | -0.06  | 0.109  |
| 21 | C      | -5.6   | -0.821 | -0.165 | 46 | C      | 5.991  | 2.087  | 0.408  |
| 22 | H      | -6.224 | 0.06   | -0.109 | 47 | B      | -3.521 | 0.602  | 0.563  |
| 23 | C      | -5.991 | -2.087 | -0.408 | 48 | H      | 6.992  | 2.447  | 0.59   |
| 24 | B      | 3.521  | -0.602 | -0.563 | 49 | H      | -6.992 | -2.447 | -0.59  |
| 25 | S      | 4.626  | 3.166  | 0.391  | 50 | F      | -3.742 | 0.692  | 1.93   |

**Table Appx-2.** Cartesian coordinates of the DFT optimized geometry of **3M-syn** at the ground state calculated at the level of  $\omega$ B97XD/6-31G(d).

Imaginary Freq: 0

Total Energy (Hartree): -2446.301

| Symbol | X | Y         | Z         | Symbol    | X  | Y | Z         |           |           |
|--------|---|-----------|-----------|-----------|----|---|-----------|-----------|-----------|
| 1      | S | -4.538889 | -3.136169 | -0.572384 | 26 | F | -3.998359 | 0.768223  | 1.804479  |
| 2      | F | 3.998362  | -0.768221 | 1.804474  | 27 | N | 2.238753  | 2.011912  | 0.217662  |
| 3      | N | -2.238752 | -2.011912 | 0.217667  | 28 | N | -2.075472 | 0.34231   | 0.402796  |
| 4      | N | 2.075472  | -0.34231  | 0.402793  | 29 | N | 4.201503  | 0.646255  | -0.118849 |
| 5      | N | -4.201503 | -0.646255 | -0.118842 | 30 | H | -2.890355 | 6.188266  | -0.800303 |
| 6      | H | 2.890354  | -6.188267 | -0.800302 | 31 | C | 1.516484  | 0.910249  | 0.394313  |
| 7      | C | -1.516483 | -0.910248 | 0.394316  | 32 | C | -1.595536 | 2.669991  | 0.149665  |
| 8      | C | 1.595536  | -2.66999  | 0.149665  | 33 | C | -0.723286 | 3.771952  | 0.159266  |
| 9      | C | 0.723286  | -3.771952 | 0.159269  | 34 | H | 0.320626  | 3.608384  | 0.414423  |
| 10     | H | -0.320626 | -3.608383 | 0.414427  | 35 | C | -1.124565 | 1.332481  | 0.387159  |
| 11     | C | 1.124565  | -1.332481 | 0.387158  | 36 | C | 0.112805  | 0.71241   | 0.503291  |
| 12     | C | -0.112804 | -0.712409 | 0.503292  | 37 | C | -1.182899 | 5.03146   | -0.173014 |
| 13     | C | 1.182898  | -5.03146  | -0.173011 | 38 | H | -0.5078   | 5.880336  | -0.160024 |
| 14     | H | 0.507799  | -5.880336 | -0.16002  | 39 | C | -2.524619 | 5.200429  | -0.535172 |
| 15     | C | 2.524618  | -5.200429 | -0.53517  | 40 | C | 3.523694  | 1.811581  | -0.088182 |
| 16     | C | -3.523694 | -1.811581 | -0.088176 | 41 | C | -2.959023 | 2.847636  | -0.212245 |
| 17     | C | 2.959023  | -2.847637 | -0.212246 | 42 | O | -3.842348 | 1.837807  | -0.270989 |
| 18     | O | 3.842347  | -1.837808 | -0.270993 | 43 | C | -3.400393 | 4.127532  | -0.560707 |
| 19     | C | 3.400393  | -4.127532 | -0.560708 | 44 | H | -4.441248 | 4.25179   | -0.838839 |
| 20     | H | 4.441246  | -4.251791 | -0.838841 | 45 | C | 5.51594   | 0.782893  | -0.519135 |
| 21     | C | -5.51594  | -0.782893 | -0.519128 | 46 | H | 6.133819  | -0.102786 | -0.565803 |
| 22     | H | -6.133819 | 0.102785  | -0.565796 | 47 | C | 5.875928  | 2.048005  | -0.807384 |
| 23     | C | -5.875928 | -2.048005 | -0.807379 | 48 | B | -3.560945 | 0.640063  | 0.494966  |
| 24     | B | 3.560945  | -0.640063 | 0.494962  | 49 | H | 6.840419  | 2.403143  | -1.136908 |
| 25     | S | 4.538887  | 3.136168  | -0.572398 | 50 | H | -6.840418 | -2.403142 | -1.136905 |

**Table Appx-3.** Cartesian coordinates of the DFT optimized geometry of **4M-anti** at the ground state calculated at the level of  $\omega$ B97XD/6-31G(d).

Imaginary Freq: 0

Total Energy (Hartree): -2709.7047

|    | Symbol | X         | Y         | Z         |    | Symbol | X         | Y         | Z         |
|----|--------|-----------|-----------|-----------|----|--------|-----------|-----------|-----------|
| 1  | S      | -3.854679 | 3.882428  | -1.286105 | 36 | O      | 3.893232  | 1.143128  | 1.462164  |
| 2  | O      | -3.893233 | -1.143128 | -1.462164 | 37 | N      | 2.07246   | -0.000516 | 0.372466  |
| 3  | N      | -2.07246  | 0.000516  | -0.372467 | 38 | N      | 1.855933  | -2.35774  | 0.363898  |
| 4  | N      | -1.855933 | 2.35774   | -0.363899 | 39 | N      | 3.943717  | -1.343661 | 1.038201  |
| 5  | N      | -3.943718 | 1.343661  | -1.0382   | 40 | C      | 1.292101  | 1.125537  | 0.335879  |
| 6  | C      | -1.292101 | -1.125537 | -0.335881 | 41 | C      | -0.003949 | 0.718134  | 0.048388  |
| 7  | C      | 0.003949  | -0.718134 | -0.048391 | 42 | C      | 1.336512  | -1.144317 | 0.2029    |
| 8  | C      | -1.336512 | 1.144317  | -0.202901 | 43 | C      | 3.110053  | -2.380398 | 0.830163  |
| 9  | C      | -3.110054 | 2.380398  | -0.830162 | 44 | C      | 5.306642  | -3.043194 | 1.746629  |
| 10 | C      | -5.306643 | 3.043195  | -1.746627 | 45 | C      | 5.172505  | -1.718925 | 1.541571  |
| 11 | C      | -5.172506 | 1.718925  | -1.541569 | 46 | H      | 5.909959  | -0.949309 | 1.72176   |
| 12 | H      | -5.90996  | 0.949309  | -1.721758 | 47 | C      | 1.925394  | 2.360161  | 0.71977   |
| 13 | C      | -1.925394 | -2.360161 | -0.719772 | 48 | C      | 1.256372  | 3.591598  | 0.628626  |
| 14 | C      | -1.256372 | -3.591598 | -0.628628 | 49 | H      | 0.267634  | 3.615552  | 0.176363  |
| 15 | H      | -0.267634 | -3.615552 | -0.176366 | 50 | C      | 1.841036  | 4.743477  | 1.119842  |
| 16 | C      | -1.841037 | -4.743476 | -1.119844 | 51 | H      | 1.325358  | 5.694536  | 1.041448  |
| 17 | H      | -1.325359 | -5.694536 | -1.041451 | 52 | C      | 3.097862  | 4.668922  | 1.731295  |
| 18 | C      | -3.097863 | -4.668922 | -1.731296 | 53 | H      | 3.558558  | 5.570056  | 2.12597   |
| 19 | H      | -3.558559 | -5.570055 | -2.125971 | 54 | C      | 3.771293  | 3.462869  | 1.841475  |
| 20 | C      | -3.771294 | -3.462869 | -1.841475 | 55 | H      | 4.745819  | 3.39947   | 2.313959  |
| 21 | H      | -4.74582  | -3.39947  | -2.313959 | 56 | C      | 3.208676  | 2.290069  | 1.328443  |
| 22 | C      | -3.208677 | -2.290069 | -1.328443 | 57 | C      | 4.346232  | 0.331208  | -0.920894 |
| 23 | C      | -4.346231 | -0.331208 | 0.920895  | 58 | C      | 5.397709  | 1.245391  | -1.043301 |
| 24 | C      | -5.397708 | -1.245391 | 1.043302  | 59 | H      | 5.694173  | 1.83069   | -0.176024 |
| 25 | H      | -5.694173 | -1.83069  | 0.176025  | 60 | C      | 6.065707  | 1.429089  | -2.252139 |
| 26 | C      | -6.065706 | -1.42909  | 2.25214   | 61 | H      | 6.87649   | 2.14953   | -2.320932 |
| 27 | H      | -6.876488 | -2.14953  | 2.320934  | 62 | C      | 5.690774  | 0.693736  | -3.37214  |
| 28 | C      | -5.690772 | -0.693737 | 3.372141  | 63 | H      | 6.206738  | 0.835636  | -4.317718 |
| 29 | H      | -6.206734 | -0.835638 | 4.31772   | 64 | C      | 4.646388  | -0.223533 | -3.27515  |
| 30 | C      | -4.646385 | 0.223532  | 3.275151  | 65 | H      | 4.344989  | -0.799382 | -4.145986 |
| 31 | H      | -4.344985 | 0.79938   | 4.145987  | 66 | C      | 3.98738   | -0.397797 | -2.062817 |
| 32 | C      | -3.987378 | 0.397796  | 2.062817  | 67 | H      | 3.171435  | -1.117541 | -2.009187 |
| 33 | H      | -3.171433 | 1.11754   | 2.009187  | 68 | B      | 3.596072  | 0.089098  | 0.486341  |
| 34 | B      | -3.596072 | -0.089098 | -0.486341 | 69 | H      | -6.166132 | 3.570544  | -2.131406 |
| 35 | S      | 3.854677  | -3.882428 | 1.286107  | 70 | H      | 6.16613   | -3.570544 | 2.131409  |



**Table Appx-4.** Cartesian coordinates of the DFT optimized geometry of **4M-syn(+)** at the ground state calculated at the level of  $\omega$ B97XD/6-31G(d).

Imaginary Freq: 0

Total Energy (Hartree):-2709.7057

|    | Symbol | X         | Y         | Z         |    | Symbol | X         | Y         | Z         |
|----|--------|-----------|-----------|-----------|----|--------|-----------|-----------|-----------|
| 1  | S      | -4.027773 | 3.789075  | -1.218885 | 36 | N      | 2.103675  | 0.027055  | -0.307304 |
| 2  | O      | -4.038169 | -1.227579 | -1.102583 | 37 | N      | 1.911029  | -2.32677  | -0.475738 |
| 3  | N      | -2.103675 | -0.027051 | -0.307303 | 38 | N      | 4.060295  | -1.271636 | -0.799372 |
| 4  | N      | -1.911028 | 2.326775  | -0.475738 | 39 | C      | -0.005035 | 0.720865  | -0.200409 |
| 5  | N      | -4.060296 | 1.271642  | -0.799364 | 40 | C      | 1.311356  | 1.146214  | -0.324989 |
| 6  | C      | 0.005036  | -0.720861 | -0.200411 | 41 | C      | 1.363381  | -1.125849 | -0.315248 |
| 7  | C      | -1.311355 | -1.14621  | -0.324994 | 42 | C      | 1.970598  | 2.397812  | -0.591782 |
| 8  | C      | -1.36338  | 1.125853  | -0.315245 | 43 | C      | 1.27683   | 3.618799  | -0.560766 |
| 9  | C      | -1.970597 | -2.397806 | -0.591794 | 44 | H      | 0.234549  | 3.618858  | -0.252581 |
| 10 | C      | -1.276829 | -3.618794 | -0.560782 | 45 | C      | 1.902558  | 4.790406  | -0.942219 |
| 11 | H      | -0.234549 | -3.618855 | -0.252595 | 46 | H      | 1.365058  | 5.732056  | -0.911196 |
| 12 | C      | -1.902556 | -4.790399 | -0.942242 | 47 | C      | 3.230878  | 4.748335  | -1.380987 |
| 13 | H      | -1.365057 | -5.73205  | -0.911222 | 48 | C      | 3.93139   | 3.553933  | -1.430969 |
| 14 | C      | -3.230875 | -4.748325 | -1.381013 | 49 | H      | 4.960895  | 3.514782  | -1.770854 |
| 15 | C      | -3.931387 | -3.553923 | -1.430991 | 50 | C      | 3.323696  | 2.36059   | -1.028283 |
| 16 | H      | -4.960891 | -3.514771 | -1.770878 | 51 | C      | 3.215599  | -2.319353 | -0.772607 |
| 17 | C      | -3.323693 | -2.360582 | -1.028298 | 52 | C      | 5.349078  | -1.613495 | -1.155246 |
| 18 | C      | -3.215602 | 2.319361  | -0.77259  | 53 | H      | 6.097305  | -0.833817 | -1.184536 |
| 19 | C      | -5.349085 | 1.613507  | -1.155213 | 54 | C      | 5.521208  | -2.921798 | -1.424417 |
| 20 | H      | -6.097315 | 0.833832  | -1.184488 | 55 | C      | 4.191779  | 0.302923  | 1.278353  |
| 21 | C      | -5.521235 | 2.921827  | -1.42429  | 56 | C      | 3.707971  | -0.496168 | 2.323157  |
| 22 | C      | -4.19178  | -0.302932 | 1.278347  | 57 | H      | 2.923318  | -1.225541 | 2.12539   |
| 23 | C      | -3.707979 | 0.496154  | 2.323157  | 58 | C      | 4.20199   | -0.379734 | 3.617962  |
| 24 | H      | -2.92333  | 1.225534  | 2.125397  | 59 | H      | 3.806036  | -1.009223 | 4.410228  |
| 25 | C      | -4.201999 | 0.379709  | 3.617961  | 60 | C      | 5.202448  | 0.548869  | 3.898177  |
| 26 | H      | -3.806051 | 1.009196  | 4.410232  | 61 | H      | 5.589769  | 0.645772  | 4.908658  |
| 27 | C      | -5.202453 | -0.548901 | 3.898168  | 62 | C      | 5.699083  | 1.353351  | 2.877478  |
| 28 | H      | -5.589775 | -0.645813 | 4.908648  | 63 | H      | 6.476345  | 2.082832  | 3.089251  |
| 29 | C      | -5.699082 | -1.353379 | 2.877463  | 64 | C      | 5.195867  | 1.227164  | 1.584279  |
| 30 | H      | -6.476341 | -2.082866 | 3.08923   | 65 | H      | 5.586193  | 1.865809  | 0.795371  |
| 31 | C      | -5.195864 | -1.227181 | 1.584266  | 66 | B      | 3.628865  | 0.12813   | -0.222061 |
| 32 | H      | -5.586185 | -1.865822 | 0.795352  | 67 | H      | 6.429404  | -3.423272 | -1.721968 |
| 33 | B      | -3.628864 | -0.128127 | -0.222063 | 68 | H      | -6.42945  | 3.423316  | -1.721757 |
| 34 | S      | 4.027792  | -3.789079 | -1.218824 | 69 | H      | 3.726039  | 5.665407  | -1.687308 |
| 35 | O      | 4.038172  | 1.227588  | -1.102572 | 70 | H      | -3.726036 | -5.665396 | -1.687339 |

**Table Appx-5.** Cartesian coordinates of the DFT optimized geometry of **4M-syn(-)** at the ground state calculated at the level of  $\omega$ B97XD/6-31G(d).

Imaginary Freq: 0

Total Energy (Hartree): -2709.7057

|    | Symbol | X         | Y         | Z         |    | Symbol | X         | Y         | Z         |
|----|--------|-----------|-----------|-----------|----|--------|-----------|-----------|-----------|
| 1  | S      | 4.027773  | 3.789075  | -1.218885 | 36 | N      | -2.103675 | 0.027055  | -0.307304 |
| 2  | O      | 4.038169  | -1.227579 | -1.102583 | 37 | N      | -1.911029 | -2.32677  | -0.475738 |
| 3  | N      | 2.103675  | -0.027051 | -0.307303 | 38 | N      | -4.060295 | -1.271636 | -0.799372 |
| 4  | N      | 1.911028  | 2.326775  | -0.475738 | 39 | C      | 0.005035  | 0.720865  | -0.200409 |
| 5  | N      | 4.060296  | 1.271642  | -0.799364 | 40 | C      | -1.311356 | 1.146214  | -0.324989 |
| 6  | C      | -0.005036 | -0.720861 | -0.200411 | 41 | C      | -1.363381 | -1.125849 | -0.315248 |
| 7  | C      | 1.311355  | -1.14621  | -0.324994 | 42 | C      | -1.970598 | 2.397812  | -0.591782 |
| 8  | C      | 1.36338   | 1.125853  | -0.315245 | 43 | C      | -1.27683  | 3.618799  | -0.560766 |
| 9  | C      | 1.970597  | -2.397806 | -0.591794 | 44 | H      | -0.234549 | 3.618858  | -0.252581 |
| 10 | C      | 1.276829  | -3.618794 | -0.560782 | 45 | C      | -1.902558 | 4.790406  | -0.942219 |
| 11 | H      | 0.234549  | -3.618855 | -0.252595 | 46 | H      | -1.365058 | 5.732056  | -0.911196 |
| 12 | C      | 1.902556  | -4.790399 | -0.942242 | 47 | C      | -3.230878 | 4.748335  | -1.380987 |
| 13 | H      | 1.365057  | -5.73205  | -0.911222 | 48 | C      | -3.93139  | 3.553933  | -1.430969 |
| 14 | C      | 3.230875  | -4.748325 | -1.381013 | 49 | H      | -4.960895 | 3.514782  | -1.770854 |
| 15 | C      | 3.931387  | -3.553923 | -1.430991 | 50 | C      | -3.323696 | 2.36059   | -1.028283 |
| 16 | H      | 4.960891  | -3.514771 | -1.770878 | 51 | C      | -3.215599 | -2.319353 | -0.772607 |
| 17 | C      | 3.323693  | -2.360582 | -1.028298 | 52 | C      | -5.349078 | -1.613495 | -1.155246 |
| 18 | C      | 3.215602  | 2.319361  | -0.77259  | 53 | H      | -6.097305 | -0.833817 | -1.184536 |
| 19 | C      | 5.349085  | 1.613507  | -1.155213 | 54 | C      | -5.521208 | -2.921798 | -1.424417 |
| 20 | H      | 6.097315  | 0.833832  | -1.184488 | 55 | C      | -4.191779 | 0.302923  | 1.278353  |
| 21 | C      | 5.521235  | 2.921827  | -1.42429  | 56 | C      | -3.707971 | -0.496168 | 2.323157  |
| 22 | C      | 4.19178   | -0.302932 | 1.278347  | 57 | H      | -2.923318 | -1.225541 | 2.12539   |
| 23 | C      | 3.707979  | 0.496154  | 2.323157  | 58 | C      | -4.20199  | -0.379734 | 3.617962  |
| 24 | H      | 2.92333   | 1.225534  | 2.125397  | 59 | H      | -3.806036 | -1.009223 | 4.410228  |
| 25 | C      | 4.201999  | 0.379709  | 3.617961  | 60 | C      | -5.202448 | 0.548869  | 3.898177  |
| 26 | H      | 3.806051  | 1.009196  | 4.410232  | 61 | H      | -5.589769 | 0.645772  | 4.908658  |
| 27 | C      | 5.202453  | -0.548901 | 3.898168  | 62 | C      | -5.699083 | 1.353351  | 2.877478  |
| 28 | H      | 5.589775  | -0.645813 | 4.908648  | 63 | H      | -6.476345 | 2.082832  | 3.089251  |
| 29 | C      | 5.699082  | -1.353379 | 2.877463  | 64 | C      | -5.195867 | 1.227164  | 1.584279  |
| 30 | H      | 6.476341  | -2.082866 | 3.08923   | 65 | H      | -5.586193 | 1.865809  | 0.795371  |
| 31 | C      | 5.195864  | -1.227181 | 1.584266  | 66 | B      | -3.628865 | 0.12813   | -0.222061 |
| 32 | H      | 5.586185  | -1.865822 | 0.795352  | 67 | H      | -6.429404 | -3.423272 | -1.721968 |
| 33 | B      | 3.628864  | -0.128127 | -0.222063 | 68 | H      | 6.42945   | 3.423316  | -1.721757 |
| 34 | S      | -4.027792 | -3.789079 | -1.218824 | 69 | H      | -3.726039 | 5.665407  | -1.687308 |
| 35 | O      | -4.038172 | 1.227588  | -1.102572 | 70 | H      | 3.726036  | -5.665396 | -1.687339 |

**Table Appx-6.** Cartesian coordinates of the DFT optimized geometry of **5M** at the ground state calculated at the level of  $\omega$ B97XD/6-31G(d).

Imaginary Freq: 0

Total Energy (Hartree): -2496.7554

|    | Symbol | X         | Y         | Z         |    | Symbol | X         | Y         | Z         |
|----|--------|-----------|-----------|-----------|----|--------|-----------|-----------|-----------|
| 1  | C      | 0.661081  | -0.259476 | -0.022884 | 27 | C      | -3.651949 | 0.282124  | -0.631897 |
| 2  | C      | -0.661081 | 0.259476  | -0.022884 | 28 | S      | 2.327825  | -5.110431 | -0.388833 |
| 3  | C      | -0.54185  | 1.682539  | 0.013315  | 29 | C      | 1.049752  | -6.28851  | -0.468871 |
| 4  | N      | 0.812122  | 1.975702  | 0.082116  | 30 | C      | -0.152711 | -5.697266 | -0.330459 |
| 5  | C      | 1.552296  | 0.792053  | 0.056697  | 31 | N      | -0.089433 | -4.328172 | -0.158729 |
| 6  | C      | 0.54185   | -1.682539 | 0.013315  | 32 | S      | -2.327825 | 5.110431  | -0.388833 |
| 7  | N      | -0.812122 | -1.975702 | 0.082116  | 33 | C      | -1.049752 | 6.28851   | -0.468871 |
| 8  | C      | -1.552296 | -0.792053 | 0.056697  | 34 | C      | 0.152711  | 5.697266  | -0.330459 |
| 9  | C      | 1.156511  | -3.847033 | -0.169561 | 35 | F      | -1.751162 | -3.758476 | 1.454834  |
| 10 | C      | -1.156511 | 3.847033  | -0.169561 | 36 | F      | -2.327825 | -3.690025 | -0.762613 |
| 11 | N      | 0.089433  | 4.328172  | -0.158729 | 37 | F      | 2.327825  | 3.690025  | -0.762613 |
| 12 | N      | -1.517823 | 2.569727  | -0.071603 | 38 | F      | 1.751162  | 3.758476  | 1.454834  |
| 13 | B      | 1.343724  | 3.437998  | 0.164236  | 39 | H      | 3.301322  | 2.344751  | 1.502241  |
| 14 | N      | 1.517823  | -2.569727 | -0.071603 | 40 | H      | 5.748101  | 2.093828  | 1.583667  |
| 15 | B      | -1.343724 | -3.437998 | 0.164236  | 41 | H      | 5.516424  | -1.188088 | -1.17795  |
| 16 | C      | 3.013447  | 0.720118  | 0.111894  | 42 | H      | 3.061466  | -0.955313 | -1.24195  |
| 17 | C      | -3.013447 | -0.720118 | 0.111894  | 43 | H      | -3.301322 | -2.344751 | 1.502241  |
| 18 | C      | 3.782391  | 1.576075  | 0.911483  | 44 | H      | -5.748101 | -2.093828 | 1.583667  |
| 19 | C      | 5.16193   | 1.429593  | 0.956376  | 45 | H      | -5.516424 | 1.188088  | -1.17795  |
| 20 | C      | 5.791494  | 0.440285  | 0.205317  | 46 | H      | -3.061466 | 0.955313  | -1.24195  |
| 21 | C      | 5.033024  | -0.41433  | -0.589709 | 47 | H      | 1.258412  | -7.337904 | -0.611288 |
| 22 | C      | 3.651949  | -0.282124 | -0.631897 | 48 | H      | -1.123204 | -6.172376 | -0.33887  |
| 23 | C      | -3.782391 | -1.576075 | 0.911483  | 49 | H      | -1.258412 | 7.337904  | -0.611288 |
| 24 | C      | -5.16193  | -1.429593 | 0.956376  | 50 | H      | 1.123204  | 6.172376  | -0.33887  |
| 25 | C      | -5.791494 | -0.440285 | 0.205317  | 51 | H      | 6.871762  | 0.334396  | 0.24162   |
| 26 | C      | -5.033024 | 0.41433   | -0.589709 | 52 | H      | -6.871762 | -0.334396 | 0.24162   |

**Table Appx-7.** Cartesian coordinates of the DFT optimized geometry of **6M** at the ground state calculated at the level of  $\omega$ B97XD/6-31G(d).

Imaginary Freq: 0

Total Energy (Hartree): -3138.2809

|    | Symbol | X         | Y         | Z         |    | Symbol | X         | Y         | Z         |
|----|--------|-----------|-----------|-----------|----|--------|-----------|-----------|-----------|
| 1  | S      | -4.948634 | 2.698388  | 0.028343  | 24 | C      | 5.712274  | -0.270135 | -0.170583 |
| 2  | C      | -3.763775 | 1.427619  | 0.007136  | 25 | C      | 6.220691  | -1.5171   | -0.150204 |
| 3  | N      | -4.334003 | 0.223204  | 0.089387  | 26 | B      | 3.521809  | 1.118564  | -0.042585 |
| 4  | C      | -5.71243  | 0.270119  | 0.170892  | 27 | F      | 3.799995  | 1.850394  | -1.17627  |
| 5  | C      | -6.220857 | 1.517083  | 0.150684  | 28 | F      | 3.885384  | 1.793706  | 1.111566  |
| 6  | B      | -3.521974 | -1.118551 | 0.04248   | 29 | N      | 2.46222   | -1.688473 | 0.06934   |
| 7  | F      | -3.800072 | -1.850527 | 1.176093  | 30 | N      | 2.02795   | 0.679388  | 0.010607  |
| 8  | F      | -3.885684 | -1.793514 | -1.111733 | 31 | C      | 1.638735  | -0.651191 | 0.041456  |
| 9  | N      | -2.462416 | 1.688485  | -0.069327 | 32 | C      | 0.902667  | 1.501186  | -0.029295 |
| 10 | N      | -2.028109 | -0.679379 | -0.010798 | 33 | C      | -0.215656 | 0.675455  | -0.028473 |
| 11 | C      | -1.638907 | 0.651214  | -0.041599 | 34 | C      | 0.916065  | 2.944489  | -0.080961 |
| 12 | C      | -0.902795 | -1.501156 | 0.029051  | 35 | C      | -0.138743 | 3.694964  | -0.566227 |
| 13 | C      | 0.215492  | -0.675401 | 0.028246  | 36 | H      | -1.043151 | 3.243494  | -0.951964 |
| 14 | C      | -0.915984 | -2.944461 | 0.080797  | 37 | C      | 0.080009  | 5.086929  | -0.482673 |
| 15 | C      | 0.139054  | -3.694673 | 0.565972  | 38 | H      | -0.627391 | 5.833395  | -0.822124 |
| 16 | H      | 1.043403  | -3.242965 | 0.951578  | 39 | C      | 1.290969  | 5.383163  | 0.081299  |
| 17 | C      | -0.079389 | -5.086692 | 0.482538  | 40 | S      | 2.184463  | 3.9886    | 0.50357   |
| 18 | H      | 0.628211  | -5.832975 | 0.821974  | 41 | H      | -1.70732  | -6.362945 | -0.274253 |
| 19 | C      | -1.290335 | -5.383234 | -0.081301 | 42 | H      | 1.708158  | 6.362767  | 0.274351  |
| 20 | S      | -2.184137 | -3.988901 | -0.503685 | 43 | H      | -7.25853  | 1.809537  | 0.202247  |
| 21 | S      | 4.948447  | -2.698389 | -0.027931 | 44 | H      | -6.258071 | -0.659928 | 0.241173  |
| 22 | C      | 3.76359   | -1.427614 | -0.00698  | 45 | H      | 6.257928  | 0.659903  | -0.240877 |
| 23 | N      | 4.333837  | -0.223206 | -0.089252 | 46 | H      | 7.258369  | -1.809563 | -0.201613 |

**Table Appx-8.** Cartesian coordinates of the DFT optimized geometry of **4M-anti** at the excited state (S<sub>1</sub>) calculated at the level of ωB97XD/6-31G(d).

Total Energy (Hartree): -2709.6238

| Symbol | X | Y      | Z      | Symbol | X  | Y | Z      |        |        |
|--------|---|--------|--------|--------|----|---|--------|--------|--------|
| 1      | S | -3.873 | 3.864  | -1.324 | 36 | O | 3.896  | 1.175  | 1.447  |
| 2      | O | -3.896 | -1.175 | -1.447 | 37 | N | 2.087  | 0.019  | 0.351  |
| 3      | N | -2.087 | -0.019 | -0.351 | 38 | N | 1.868  | -2.34  | 0.401  |
| 4      | N | -1.868 | 2.34   | -0.401 | 39 | N | 3.954  | -1.317 | 1.058  |
| 5      | N | -3.954 | 1.317  | -1.058 | 40 | C | 1.319  | 1.139  | 0.31   |
| 6      | C | -1.319 | -1.139 | -0.31  | 41 | C | -0.007 | 0.706  | 0.037  |
| 7      | C | 0.007  | -0.706 | -0.037 | 42 | C | 1.352  | -1.126 | 0.204  |
| 8      | C | -1.352 | 1.126  | -0.204 | 43 | C | 3.118  | -2.364 | 0.862  |
| 9      | C | -3.118 | 2.364  | -0.862 | 44 | C | 5.322  | -3.013 | 1.767  |
| 10     | C | -5.322 | 3.013  | -1.767 | 45 | C | 5.183  | -1.689 | 1.552  |
| 11     | C | -5.183 | 1.689  | -1.552 | 46 | H | 5.924  | -0.92  | 1.721  |
| 12     | H | -5.924 | 0.92   | -1.721 | 47 | C | 1.922  | 2.374  | 0.696  |
| 13     | C | -1.922 | -2.374 | -0.696 | 48 | C | 1.238  | 3.602  | 0.613  |
| 14     | C | -1.238 | -3.602 | -0.613 | 49 | H | 0.251  | 3.618  | 0.155  |
| 15     | H | -0.251 | -3.618 | -0.155 | 50 | C | 1.808  | 4.754  | 1.119  |
| 16     | C | -1.808 | -4.754 | -1.119 | 51 | H | 1.281  | 5.699  | 1.048  |
| 17     | H | -1.281 | -5.699 | -1.048 | 52 | C | 3.065  | 4.692  | 1.733  |
| 18     | C | -3.065 | -4.692 | -1.733 | 53 | H | 3.513  | 5.596  | 2.136  |
| 19     | H | -3.513 | -5.596 | -2.136 | 54 | C | 3.755  | 3.492  | 1.836  |
| 20     | C | -3.755 | -3.492 | -1.836 | 55 | H | 4.727  | 3.438  | 2.314  |
| 21     | H | -4.727 | -3.438 | -2.314 | 56 | C | 3.209  | 2.319  | 1.314  |
| 22     | C | -3.209 | -2.319 | -1.314 | 57 | C | 4.371  | 0.328  | -0.922 |
| 23     | C | -4.371 | -0.328 | 0.922  | 58 | C | 5.419  | 1.246  | -1.049 |
| 24     | C | -5.419 | -1.246 | 1.049  | 59 | H | 5.703  | 1.848  | -0.188 |
| 25     | H | -5.703 | -1.848 | 0.188  | 60 | C | 6.097  | 1.414  | -2.254 |
| 26     | C | -6.097 | -1.414 | 2.254  | 61 | H | 6.905  | 2.138  | -2.327 |
| 27     | H | -6.905 | -2.138 | 2.327  | 62 | C | 5.738  | 0.658  | -3.365 |
| 28     | C | -5.738 | -0.658 | 3.365  | 63 | H | 6.262  | 0.788  | -4.308 |
| 29     | H | -6.262 | -0.788 | 4.308  | 64 | C | 4.697  | -0.263 | -3.264 |
| 30     | C | -4.697 | 0.263  | 3.264  | 65 | H | 4.408  | -0.855 | -4.128 |
| 31     | H | -4.408 | 0.855  | 4.128  | 66 | C | 4.028  | -0.422 | -2.055 |
| 32     | C | -4.028 | 0.422  | 2.055  | 67 | H | 3.215  | -1.145 | -1.997 |
| 33     | H | -3.215 | 1.145  | 1.997  | 68 | B | 3.61   | 0.106  | 0.481  |
| 34     | B | -3.61  | -0.106 | -0.481 | 69 | H | -6.187 | 3.533  | -2.152 |
| 35     | S | 3.873  | -3.864 | 1.324  | 70 | H | 6.187  | -3.533 | 2.152  |

**Table Appx-9.** Cartesian coordinates of the DFT optimized geometry of **4M-syn(+)** at the excited state (S<sub>1</sub>) calculated at the level of  $\omega$ B97XD/6-31G(d).

Total Energy (Hartree): -2709.6241

| Symbol | X | Y         | Z         | Symbol    | X  | Y | Z         |           |           |
|--------|---|-----------|-----------|-----------|----|---|-----------|-----------|-----------|
| 1      | S | -4.07174  | 3.791499  | -1.177274 | 36 | N | 2.11516   | 0.041331  | -0.342275 |
| 2      | O | -4.063408 | -1.246136 | -1.08873  | 37 | N | 1.93104   | -2.314433 | -0.525487 |
| 3      | N | -2.11516  | -0.041328 | -0.34227  | 38 | N | 4.084355  | -1.257763 | -0.796129 |
| 4      | N | -1.931042 | 2.314437  | -0.525461 | 39 | C | -0.008494 | 0.707504  | -0.292344 |
| 5      | N | -4.084357 | 1.25777   | -0.796108 | 40 | C | 1.338415  | 1.155539  | -0.372735 |
| 6      | C | 0.008493  | -0.707501 | -0.29235  | 41 | C | 1.377716  | -1.110939 | -0.365018 |
| 7      | C | -1.338416 | -1.155536 | -0.372742 | 42 | C | 1.980261  | 2.405694  | -0.622823 |
| 8      | C | -1.377717 | 1.110942  | -0.365005 | 43 | C | 1.277849  | 3.626251  | -0.615713 |
| 9      | C | -1.980263 | -2.405688 | -0.62284  | 44 | H | 0.22723   | 3.621622  | -0.334387 |
| 10     | C | -1.277851 | -3.626245 | -0.615742 | 45 | C | 1.907654  | 4.797632  | -0.988246 |
| 11     | H | -0.22723  | -3.621619 | -0.334419 | 46 | H | 1.36346   | 5.736222  | -0.976959 |
| 12     | C | -1.907656 | -4.797623 | -0.988284 | 47 | C | 3.248234  | 4.764593  | -1.393183 |
| 13     | H | -1.363462 | -5.736213 | -0.977007 | 48 | C | 3.958488  | 3.573431  | -1.421201 |
| 14     | C | -3.248237 | -4.76458  | -1.393218 | 49 | H | 4.995628  | 3.540071  | -1.737957 |
| 15     | C | -3.958491 | -3.573418 | -1.421223 | 50 | C | 3.349616  | 2.379636  | -1.029359 |
| 16     | H | -4.995632 | -3.540056 | -1.737976 | 51 | C | 3.23791   | -2.315224 | -0.779906 |
| 17     | C | -3.349618 | -2.379627 | -1.029372 | 52 | C | 5.380072  | -1.604576 | -1.103171 |
| 18     | C | -3.237912 | 2.315231  | -0.779878 | 53 | H | 6.130807  | -0.826588 | -1.119803 |
| 19     | C | -5.380075 | 1.604585  | -1.103144 | 54 | C | 5.564709  | -2.91844  | -1.347855 |
| 20     | H | -6.13081  | 0.826598  | -1.119781 | 55 | C | 4.164448  | 0.305825  | 1.290581  |
| 21     | C | -5.564712 | 2.918452  | -1.347817 | 56 | C | 3.650678  | -0.489894 | 2.323565  |
| 22     | C | -4.164445 | -0.305836 | 1.290589  | 57 | H | 2.864306  | -1.212194 | 2.107618  |
| 23     | C | -3.650671 | 0.489872  | 2.323579  | 58 | C | 4.116302  | -0.377489 | 3.629162  |
| 24     | H | -2.864299 | 1.212175  | 2.107635  | 59 | H | 3.697133  | -1.003614 | 4.412156  |
| 25     | C | -4.116292 | 0.377456  | 3.629175  | 60 | C | 5.118336  | 0.542318  | 3.932181  |
| 26     | H | -3.697121 | 1.003574  | 4.412174  | 61 | H | 5.483719  | 0.635592  | 4.951149  |
| 27     | C | -5.118326 | -0.542353 | 3.932189  | 62 | C | 5.644679  | 1.3427    | 2.923217  |
| 28     | H | -5.483706 | -0.635636 | 4.951157  | 63 | H | 6.423026  | 2.06565   | 3.152735  |
| 29     | C | -5.644672 | -1.342725 | 2.923219  | 64 | C | 5.169382  | 1.221481  | 1.618972  |
| 30     | H | -6.423018 | -2.065678 | 3.152733  | 65 | H | 5.581938  | 1.857713  | 0.839419  |
| 31     | C | -5.169378 | -1.221495 | 1.618974  | 66 | B | 3.638436  | 0.138145  | -0.223493 |
| 32     | H | -5.581937 | -1.85772  | 0.839417  | 67 | H | 6.484771  | -3.418579 | -1.609621 |
| 33     | B | -3.638437 | -0.138143 | -0.223486 | 68 | H | -6.484775 | 3.418593  | -1.609577 |
| 34     | S | 4.071736  | -3.791489 | -1.177318 | 69 | H | 3.7441    | 5.684336  | -1.689965 |
| 35     | O | 4.063405  | 1.246146  | -1.088729 | 70 | H | -3.744104 | -5.684321 | -1.690007 |
